# Using developmental rules to align microevolution with macroevolution

## ABSTRACT

Macroevolutionary biologists have classically rejected the notion that higher level patterns of divergence arise through microevolutionary processes acting within populations. For morphology, this consensus partly derives from the inability of quantitative genetics models to correctly predict the behavior of evolutionary processes at the scale of millions of years. Developmental studies (evo-devo) have been proposed to reconcile micro and macroevolution. However, there has been little progress in establishing a formal framework to apply evo-devo models of phenotypic diversification. Here, we reframe this issue by asking if using evo-devo models to quantify biological variation can improve the explanatory power of comparative models, thus helping us bridge the gap between micro- and macroevolution. We test this prediction by evaluating the evolution of primate lower molars in a comprehensive dataset densely sampled across living and extinct taxa. Our results suggest that biologically-informed morphospaces alongside quantitative genetics models allow a seamless transition between the micro and macro scales, while biologically uninformed spaces do not. We show that the adaptive landscape for primate teeth is corridor-like, with changes in morphology within the corridor being nearly neutral. Overall, our framework provides a basis for integrating evo-devo into the modern synthesis, allowing an operational way to evaluate the ultimate causes of macroevolution.

**Macroevolution | Microevolution | Evo-Devo | Inhibitory Cascade Model | Morphospace**

1 “Macroevolution” is the field of study that aims to understand how the diversification of life occurred on our planet over  
2 large time scales<sup>1</sup>. Like any other historical science, it seeks to make sense of patterns over time ingrained in the fossil  
3 record and phylogenetic trees by referencing well-understood processes known from direct observations and experimentation<sup>2</sup>.  
4 In the case of evolutionary biology, this knowledge comes mainly from fields such as ecology and genetics, which tend to  
5 map evolutionary phenomena that take place during shorter time scales. For this reason, these studies are sometimes called  
6 “microevolution” and are designed to understand how population-level phenomena can produce evolutionary change. However,  
7 despite the presumed direct relationship between micro- and macro levels, quantitative studies have struggled to explain most  
8 macroevolutionary patterns in terms of microevolutionary processes<sup>3–7</sup>. Nevertheless, empirical results have consistently  
9 shown that the availability of additive genetic variation correlates strongly with rates of macroevolution for different traits<sup>6,8–13</sup>,  
10 suggesting some effect of lower level microevolutionary processes at the macroevolutionary scale. Whether we can bridge the  
11 gap between these two scales is still unclear, with some authors arguing for their essential irreconcilability<sup>3,14,15</sup> and others  
12 advocating for reconciliation within the context of the modern synthesis<sup>5,8–10,16–23</sup>.

13 One long-standing suggestion for bridging the gap between micro- and macroevolution has been through the study of  
14 developmental biology and ontogeny (*i.e.* evo-devo)<sup>10,19,24–28</sup>. This suggestion, however, has been challenging to implement.  
15 In a microevolutionary context, development can often be reasonably assumed to be a smooth genotype-to-phenotype (GP)  
16 map, *i.e.* genotypic variation translates to phenotypic variation in a linear way, with traits being influenced by multiple  
17 genes of smaller effect. Such a smooth GP map would, in turn, allow the modeling of evolution and adaptation of the adult  
18 phenotype using a quantitative genetic framework, precisely because these classes of models entail this simplified, linear GP  
19 mapping<sup>18–20,29</sup>. On larger time scales, however, genetic architectures can change, selection can fluctuate, and development  
20 can be reorganized, generating non-linearities between genotypic and phenotypic divergence, even if the GP map was originally  
21 smooth. On the phenotypic level, these non-linearities can produce discontinuities, *i.e.*, regions of the morphospace less  
22 inhabited, or not inhabited at all by species, then impeding a straightforward extrapolation of microevolutionary processes  
23 over millions of years<sup>19,27,30–32</sup>. Therefore, in the absence of in-depth knowledge of development and the GP map, it is likely  
24 that macroevolutionary studies will find heterogeneity and discontinuities, even if the underlying genetic changes at the  
25 microevolutionary scale are relatively smooth and continuous<sup>19</sup>. Alternatively, if we can use developmental models as the basis  
26 of the quantification of morphology, we might smooth out some of these non-linearities, maximizing our ability to seamlessly  
27 connect micro and macroevolutionary scales<sup>9,10,19,30,33–36</sup>.

28 Here, we propose a new framework for the investigation of morphological evolution over macroevolutionary time that  
29 explicitly models evolution at this scale as a consequence of underlying microevolutionary processes (Fig. 1). To deal with  
30 potential non-linearities that might arise over long time scales, we suggest the construction of developmentally informed  
31 spaces (Fig. 1Bi), which coupled with quantitative genetics modeling (Fig. 1E-G) and comparative methods (Fig. 1D),  
32 can facilitate a conceptual bridge between micro and macro scales. Under our proposed framework, we are able to directly

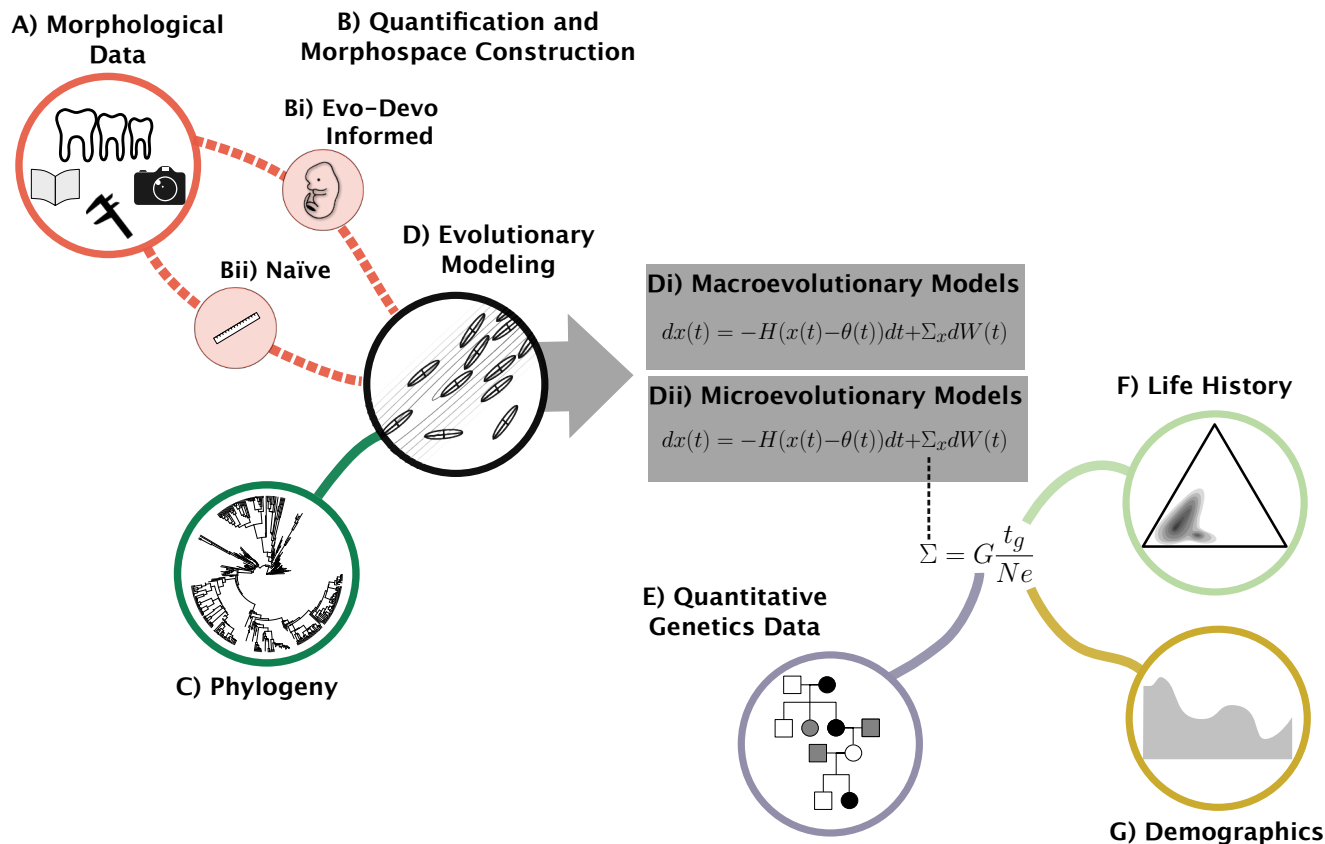

**Figure 1. Integrative evolutionary modeling framework employed in the present study.** A) Sources of morphological data, such as direct measurements with calipers, measurements extracted from photographs and data obtained from the literature. B) Process of quantification, which can be either evo-devo inspired (Bi) or "naïve" in relation to developmental processes (Bii). C) Phylogeny of the group under study. D) Evolutionary modeling used to infer adaptive landscapes (isolines) where species (ellipses) have evolved. E) Quantitative genetics data, specifically additive genetic variance-covariance matrices ( $G$ ), estimated from pedigreed populations. F) Life history data, specifically the generation time used to estimate time of divergence in generations ( $t_g$ ). G) Demographics data, specifically effective population size ( $N_e$ ). Evolutionary models can be either macroevolutionary (Di) or microevolutionary (Dii). Both models belong to the Ornstein-Uhlenbeck class of models with the same parameters (see Materials and Methods for a full description of parameters) with the single difference being that on the microevolutionary models, the stochastic rate parameter  $\Sigma$  is constrained to be equal to the rate of genetic drift. The rate of drift is modeled as being proportional to  $Gt_g/N_e$ . In our framework, the morphological data (A) is used to construct naïve or biologically informed morphospaces (B) and, together with a phylogeny (C), are used in an evolutionary modeling process (D). Different models, including microevolutionary and macroevolutionary ones can then be directly compared when they are estimated under the same morphospace.

33 compare microevolution-inspired models (henceforth called "microevolutionary models") to non-microevolution-inspired ones  
34 that account for a wider variety of rate and state-heterogeneous evolutionary processes (henceforth called "macroevolutionary  
35 models").

36 We test this workflow to investigate the evolution of primate molars, which is an ideal model system for the present  
37 investigation. First, there is a simple yet powerful evo-devo model that describes the development and evolution of Mammalian  
38 molars, the inhibitory cascade model (ICM). The ICM models teeth size (*i.e.* molar row form) as the result of a balance  
39 between inhibition and activation factors<sup>35</sup>. Specifically, it predicts that the sizes of the first, second and third molars ( $m_1$ ,  
40  $m_2$  and  $m_3$ , respectively) will either be the same ( $m_1=m_2=m_3$ ), increase ( $m_1<m_2<m_3$ ) or decrease ( $m_1>m_2>m_3$ ) along the  
41 molar row. A corollary of this prediction is that there will be a positive relationship between the ratios of the areas of the  
42 last two molars in relation to the first one ( $m_2/m_1$  and  $m_3/m_1$ ) and thus establishes a natural morphospace to investigate this  
43 developmental process. This model was initially proposed for rodents<sup>35</sup>, and later verified for multiple Mammalian species<sup>37,38</sup>,  
44 including Primates<sup>11,39,40</sup>. Second, there are several studies characterizing aspects of additive genetic variation in molars for  
45 Primates<sup>41-44</sup>, as well as large-scale life history and demographic information for the group<sup>45,46</sup>, parameters that are essential  
46 to model microevolutionary processes such as drift and selection (Fig. 1E-G). Third, tooth enamel is the most mineralized  
47 substance in vertebrate tissues, making teeth especially resistant to taphonomic processes and abundant in the fossil record  
48 (Fig. 1C). The use of a dense fossil record allows us to bridge some phylogenetic gaps between extant species, ensuring that  
49 heterogeneities along the tree are more likely due to differences in process rather than incomplete sampling. This extensive  
50 availability of paleontological and neontological data enables unprecedented power to evaluate evolutionary dynamics through  
51 deep-time using data-hungry phylogenetic comparative methods<sup>47-49</sup>. We apply our framework to an expansive dataset of  
52 both extant (232 taxa) and extinct (248 taxa) species summarized from more than 250 different sources (see Supplementary  
53 Material), integrated with a newly published comprehensive phylogeny<sup>50</sup>. To address our hypotheses, we use a model-fitting  
54 approach based on information theory (Bayesian Information Criteria, or BIC) and model simplicity (minimizing parameter  
55 number). We expect that variables devised to quantify developmental processes (ICM variables) will favor microevolutionary  
56 models, while data embedded in biologically "naïve" spaces (those with no direct correspondence to any developmental model)  
57 will favor complex macroevolutionary models.

## 58 Results

59 To test our hypothesis that the use of developmental models to quantify morphological variation would provide a better bridge  
60 between micro and macroevolution, we used three morphospaces (Fig S1). The first is based on the linear distances taken  
61 directly from the teeth ("distance space"), and the second is based on the occlusal areas of each molar ("area space"). These  
62 two spaces are considered naïve because they make no assumptions about underlying developmental processes (Fig. 1Bii). As  
63 an evo-devo inspired space (Fig. 1Bi), we used the ICM description of the molar development<sup>35</sup> and constructed a morphospace  
64 based on the relation between the relative occlusal area of  $m_2$  and  $m_3$  in relation to  $m_1$  ( $m_2/m_1$  and  $m_3/m_1$ , respectively).

65 We performed model-based clustering analyses of each set of measurements to test our prediction that development  
66 will generate discontinuous morphospaces. If, as explained above, complex developmental processes generate a patchy and  
67 discontinuous morphospace, then we expect to evaluate a high number of clusters on naïve spaces. However, if the evo-devo  
68 informed space corrects this issue, we will observe fewer clusters on the ICM morphospace. As expected, our clustering  
69 analysis shows a tendency of the ICM space to find fewer groups than the naïve spaces, suggesting the former is less patchy  
70 than the latter (Fig. 2).

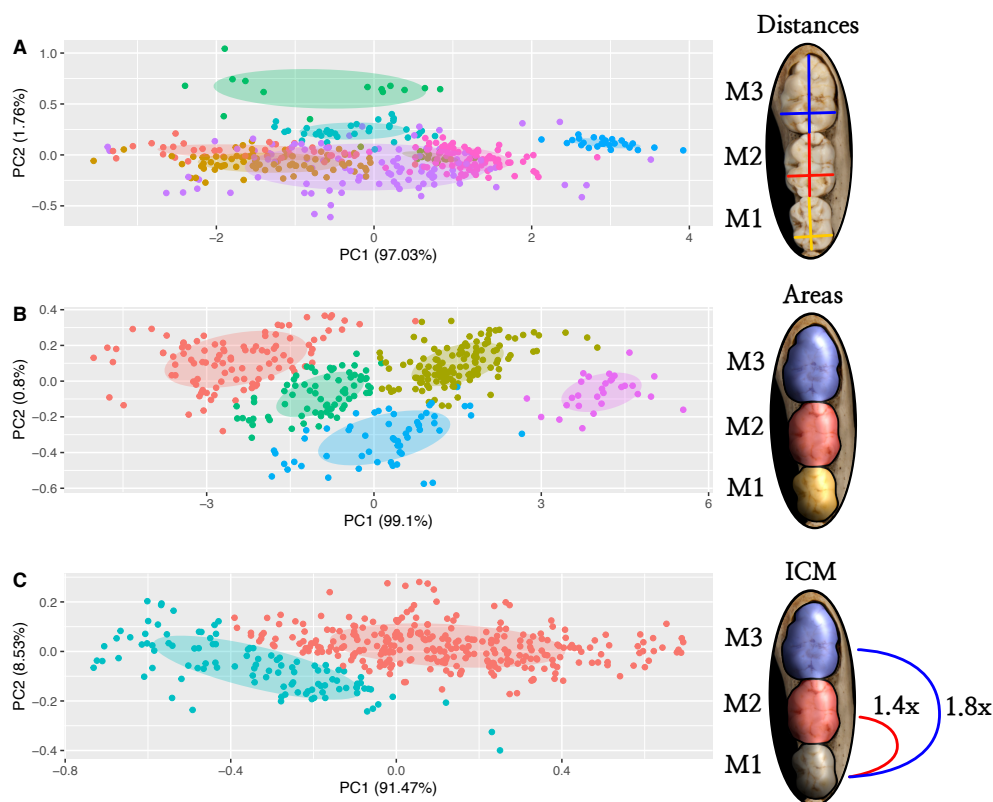

**Figure 2.** Principal component analysis of the full-sample covariance matrix for the linear distances (A), areas (B) and ICM ratios (C) morphospaces. Dots represent species averages, and colors represents groups identified in the clustering analysis. These groups are based only on morphometric proximity and do not represent any taxonomic group. The more groups a morphospace has, the more patchy and discontinuous it is considered. Axes are not depicted to scale for convenience, so distances in the graph should not be considered representative of the metric of the underlying space.

71 Our model-fitting approach showed that the use of biologically naïve morphospaces favors evolutionary model complexity.  
 72 Specifically, the best model for these spaces was a multi-regime multivariate Brownian motion (BM) model (Table 1, S1,S2).  
 73 BM is a stochastic model in which divergence accumulates linearly with time and is associated with genetic drift under a  
 74 strictly microevolutionary interpretation or random selection under a macroevolutionary interpretation. For this model, the  
 75 main parameter is the rate matrix  $\Sigma$ , which controls the traits' stochastic rate of evolution. Because the preferred model was a  
 76 multi-regime one, our tree is subdivided into different "regimes," which are parts of the tree with different model parameters  
 77 (rates of evolution for BM). For molar occlusal areas, the best model had three main regimes (Fig 3). The first regime covers  
 78 most fossil groups (thus named "ancestral regime"), including Plesiadapiformes, stem-Haplorhini, part of stem-Simiiformes,  
 79 and Tarsiidae. The second regime refers to Strepsirrhini, both crown and stem, and the third refers to crown Simiiformes  
 80 (monkeys and apes, including humans). This three-regime model was also considered a better fit than any global model  
 81 (microevolution-inspired or not) for the morphospace defined by linear distances, even though it was not the best solution found  
 82 (see Supplementary Information, Table S2). In both morphospaces, the ancestral regime accumulated more variance over time  
 83 than any derived regime, suggesting a weaker constraint on the former (Fig S8). It may be tempting to assign interpretations  
 84 that are either biological (e.g., higher divergence rates after the K-Pg extinction event resulting from ecological opportunity) or  
 85 statistical in nature (e.g., increased phylogenetic uncertainty of fossil placement resulting in upwardly biased rates<sup>51</sup>). However,  
 86 we find that such patterns do not appear universally across morphospaces, and is absence from the developmentally-informed  
 87 one, thus making any interpretation of these partitions premature.

88 By contrast, the investigation of evo-devo-inspired variables based on the ICM paints a strikingly different picture (Fig. 2C).  
 89 Instead of favoring more complex and heterogeneous models, the ICM morphospace favors a single global Ornstein–Uhlenbeck  
 90 (OU) process (Table 1). OU models, like BM, have a  $\Sigma$  which governs the stochastic rate of evolution. Differently from  
 91 BM, however, OU variance does not scale linearly with time, as the evolving species are under the influence of a phenotypic  
 92 attractor  $\theta$ , to which species converge with a rate governed by the parameter  $H$ . Under a macroevolutionary interpretation  
 93 (Fig. 1Di), OU models any evolutionary process with a constraint, be that selective, developmental, genetic, etc. Under a strict

**Table 1.** Model comparison for the primate lower molar row evolution fit through Maximum Likelihood (ML), and ranked according to the BIC.

| Traits <sup>a</sup> | Model <sup>b</sup>                    | $N_p$ <sup>c</sup> | logLik <sup>d</sup> | BIC <sup>e</sup>            |
|---------------------|---------------------------------------|--------------------|---------------------|-----------------------------|
| Linear distances    | BM                                    | 27                 | 2585.03             | -5003.38                    |
|                     | OU                                    | 54                 | 2684.57             | -5035.75                    |
|                     | BM $_{\Sigma \propto P}$              | 7                  | 2108.57             | -4173.93                    |
|                     | OU $_{\Sigma \propto P}$              | 34                 | 2174.45             | -4138.99                    |
|                     | BM $_{\Sigma \propto G}$              | 7                  | 1480.63             | -2918.04                    |
|                     | OU $_{\Sigma \propto G}$              | 34                 | 1510.57             | -2811.23                    |
|                     | Three-regime BM <sup>f</sup>          | 69                 | 2823.03             | <b>-5484.50<sup>g</sup></b> |
| Areas               | BM                                    | 9                  | 415.80              | -776.03                     |
|                     | OU                                    | 18                 | 413.98              | -716.83                     |
|                     | BM $_{\Sigma \propto P}$              | 4                  | 92.39               | -160.09                     |
|                     | OU $_{\Sigma \propto P}$              | 13                 | 275.16              | -470.06                     |
|                     | BM $_{\Sigma \propto G}$              | 4                  | 74.41               | -124.13                     |
|                     | OU $_{\Sigma \propto G}$              | 13                 | 258.02              | -435.78                     |
|                     | Three-regime BM <sup>f</sup>          | 21                 | 471.42              | <b>-813.19<sup>g</sup></b>  |
| ICM                 | BM                                    | 5                  | 589.16              | -1147.46                    |
|                     | OU <sup>D</sup>                       | 9                  | 604.56              | <u>-1153.55<sup>h</sup></u> |
|                     | BM $_{\Sigma \propto P}$              | 3                  | 538.31              | -1058.10                    |
|                     | OU $_{\Sigma \propto P}$              | 8                  | 584.68              | -1119.98                    |
|                     | BM $_{\Sigma \propto G}$              | 3                  | 575.69              | -1132.86                    |
|                     | OU <sup>D</sup> $_{\Sigma \propto G}$ | 7                  | 598.54              | <b>-1153.86<sup>g</sup></b> |
|                     | Three-regime OU <sup>f</sup>          | 26                 | 597.35              | -1034.18                    |

<sup>a</sup>Morphospace used to quantify molar form variation; either a biologically naïve space (linear distances or areas) or an evo-devo inspired space (ICM)

<sup>b</sup>Model type. Either global BM or OU models or a mixed model, which allows model and parameter heterogeneity. BM and OU can also incorporate the microevolutionary assumption that the evolutionary rate matrix ( $\Sigma$ ) is proportional to G or P ( $\Sigma \propto G$  or  $P$  models). Uppercase "D" indicates OU models with a diagonal  $H$

<sup>c</sup>Number of model parameters.

<sup>d</sup>Log-likelihood of the model

<sup>e</sup>Bayesian Information Criterion used for model comparison

<sup>f</sup>Results for the mixed model for Linear distances and ICM are based on the best regime combination found for the areas morphospace

<sup>g</sup>Bold represents the best models

<sup>h</sup>Underline represents the ones with BIC 2 units away from the best model.

microevolutionary interpretation (Fig. 1Dii),  $\Sigma$  is considered the rate of evolution due to random drift, and  $\theta$  and  $H$  govern the optimum and the shape of the adaptive landscape, respectively. To achieve this interpretation, our microevolutionary model assumes a  $\Sigma$  which is proportional to the additive genetic covariance matrix of the traits (**G**-matrix; equations 1,2, Fig. 1E), with a value within a range governed by empirical estimates of demography and life history of Primates (Fig. 1F-G;<sup>45,46</sup>). This implies that, instead of optimizing values for each entry of  $\Sigma$ , this model only fits one proportionality parameter ( $\kappa$ ), which makes it simpler and more parsimonious than the macroevolutionary one.

Both macroevolutionary (Fig. 1Bi) and microevolutionary (Fig. 1Bii) versions of this model (OU and OU $_{\Sigma \propto G}$ , respectively) had essentially the same BICs, suggesting that their information content is effectively the same (Table 1). However, inspecting the confidence intervals for the macroevolutionary OU model reveals that the 95% intervals for its parameters overlap with the values implied by the microevolutionary model (Table S3). This suggests that the OU $_{\Sigma \propto G}$  model can be interpreted in terms of microevolutionary processes not only in terms of patterns but also in terms of the magnitude of variation. So, we choose the microevolutionary OU $_{\Sigma \propto G}$  as our preferred model not only because it reports the best BIC but also because of its simplicity and biological interpretability.

Following the microevolutionary interpretation of our preferred model, the variation introduced by drift is aligned with the distribution of phenotypes on the ICM morphospace (Fig. 4A), suggesting that the similarity between intra and interspecific



109 patterns of trait variation (see<sup>11</sup>) is consistent with drift. This is further reinforced by the investigation of node-specific rates of  
110 evolution, which shows a huge overlap with rates expected under genetic drift (Fig. 5). However, drift alone would generate  
111 more variation than the total observed disparity during the period in which Primates have evolved (Fig. S7A), suggesting that  
112 stabilizing selection played a crucial role in shaping the pattern of evolution in the group as well.

113 The investigation of the adaptive landscape implied by the best model shows that stabilizing selection is aligned with the  
114 interspecific distribution of phenotypes (Fig. 4B). An examination of the half-lives ( $t_{1/2}$ , the time necessary for a species to  
115 reach halfway between the ancestral state and the regime optimum) in different directions of this adaptive landscape shows  
116 that  $t_{1/2}$  are higher along the activation-inhibition gradient direction of the ICM and lower in directions that would lead to  
117 deviations from the ICM (Fig. S5). These results indicate that the macroevolution of primate molars is being shaped by a strong  
118 stabilizing selection against deviation from the ICM pattern while allowing evolution to occur along the activation-inhibition  
119 gradient, in a corridor-like manner.

## 120 Discussion

121 Previous work has usually highlighted that larger-scale morphological evolution tends to conform to the expectation of microevo-  
122 lutionary models qualitatively but rarely (if ever) in terms of magnitudes of change<sup>6</sup>. In other words, while macroevolution  
123 seems to follow directions with more genetic variation, as expected due to neutral change<sup>6,11–13,22,52</sup>, rates of evolution tend to  
124 fall below those expected under genetic drift<sup>6–8,53</sup>. This paradox has been used to argue for a fundamental mismatch between  
125 micro and macroevolution, as simplistic quantitative genetics models seem unlikely to represent million-year evolutionary  
126 processes<sup>7,54,55</sup>. Here, we constrained the proportionality parameter for our preferred microevolutionary-inspired model to  
127 be within realistic values for Primates (equation 2; Fig. 1Dii). This constraint results in an estimated rate matrix compatible  
128 with drift around a stationary adaptive peak not only in patterns of trait association but also in magnitude. The key modeling  
129 choice that led to this conclusion was the quantification of developmentally-informed traits (Fig. 1Bi), which smoothed out  
130 transitions between microevolutionary and macroevolutionary data—defining and identifying a neutral subspace aligned with a  
131 conserved developmental process. The resulting morphospace of this modeling choice, the ICM space, lacks discontinuities  
132 along the diversity of primate molars (Fig. 2), which likely reduces the need for heterogeneous rates along the phylogenetic tree.  
133 Furthermore, by focusing on relative shape changes, which are governed by the balance of inhibitory and activation factors,  
134 this space limits the influence of other factors, such as static allometry, possibly allowing a closer match between genetic and  
135 macroevolutionary variation.

136 The differences we observe among morphometric representations might be partly due to how different spaces codify size  
137 variation. Both naïve spaces contain size information, while the ICM variables do not. By using m1 size as a scaling factor, the  
138 ICM variables still include information regarding allometric variation (technically, they are unscaled versions of the Mosimann  
139 shape ratios, see<sup>56</sup>). Both area and distance spaces are log-scaled, meaning they fit a power-law allometric model of variation<sup>57</sup>.  
140 Therefore, a higher heterogeneity in size variation in the naïve spaces might favor more complex models, while the same is not  
141 true for ICM variables. While this suggests size-correction can smooth out much of the heterogeneity in this case, this appears  
142 to derive from the fact that using shape-ratios can provide a means to quantify localized ontogenetic effects<sup>58</sup>. Nevertheless,  
143 without actual knowledge of developmental systems, it is hard to know beforehand that shape-ratios will necessarily lead to  
144 better conformity between micro and macroevolutionary scales. In fact, depending on the system, raw measurements and shape  
145 ratios might produce similar results<sup>8</sup>. Thus, studying a well-understood system such as molar development allows us to piece  
146 apart the possible role of ontogenetic models in helping us connect micro to macro scales.

147 Previous work in Primates has suggested that some traits have evolved with rates consistent with those expected under  
148 drift<sup>53,59</sup>, including some dental features<sup>60,61</sup>. These works have largely been focused on hominin species, which could bias  
149 interpretations regarding the dental evolution of the whole order. Our results partly agree with these results and extend this  
150 phenomenon to the group's origin (Fig. 5). While at face value, this suggests that drift guided over 70 myrs of dental evolution in  
151 Primates, our model-fitting approach tells otherwise. Within the microevolutionary-inspired models, OU models outperformed  
152 the BM models (Table 1), suggesting a crucial role of stabilizing selection in shaping macroevolutionary patterns. Considering  
153 the amount of variation introduced by drift every Myr (Fig 4A), a purely neutral process would result in overdispersion of  
154 tip values and higher phylogenetic signals (Fig S7). Instead, the patterns of stabilizing selection seem to be essential in  
155 shaping the ICM pattern by both constraining variation that deviates from the ICM pattern and facilitating evolution along the  
156 activation-inhibition gradient (Fig S5,S6).

157 Even though these two results might seem contradictory—rates of evolution consistent with drift and best model including  
158 stabilizing selection—we foresee at least two possibilities of how they both might be true: one has to do with the topography  
159 of the inferred adaptive landscape, and the other with the estimates of the evolutionary parameters. Regarding the adaptive  
160 landscape, the shape of the landscape implied by the preferred model is almost corridor-like (Fig 4B). If this corridor is  
161 relatively smooth internally (no great selection differentials within its limits), this would mean that species are free to explore  
162 this landscape neutrally, within the bounds of the corridor. Additionally, because the matrix of additive genetic covariances  $\mathbf{G}$

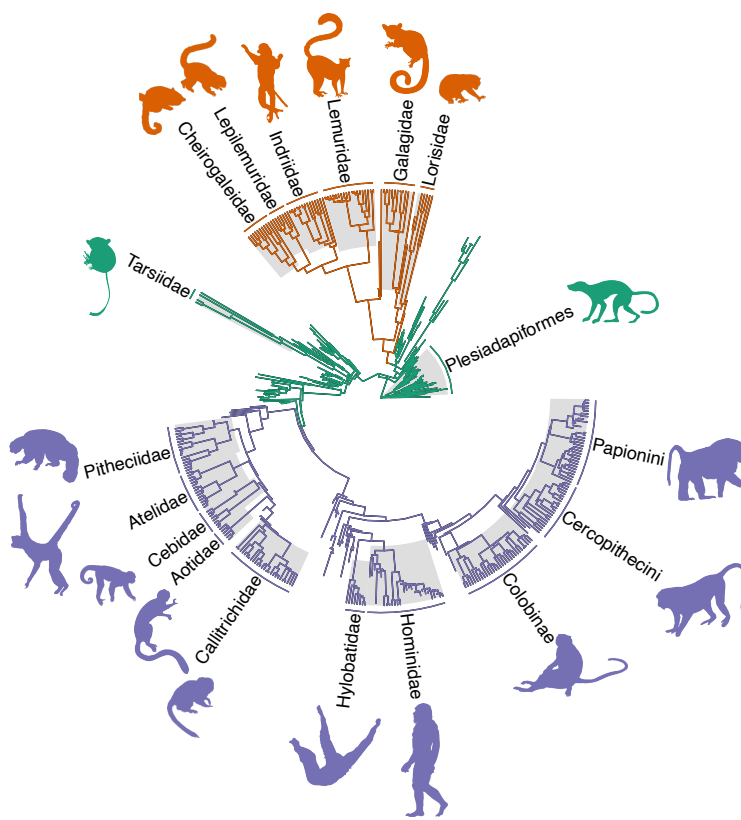

**Figure 3.** Primate phylogenetic tree painted by the best regime combination found on the phylogenetic mixed model search for the individual molar areas. A multi-regime model allows each different part of the tree (regimes) to have a different model and/or parameter combination. For areas and linear distances, the best model overall is a multi-regime BM, meaning the different highlighted clades will have different rates of stochastic evolution ( $\Sigma$ ). For ICM ratios the best mixed model is a multi-regime OU, meaning that each clade will have different rates of stochastic ( $\Sigma$ ) and deterministic ( $H$ ) evolution and optima ( $\theta$ ). However, for ICM ratios, single-regime microevolutionary models outperform all mixed models (Table 1).

163 is aligned with the corridor as well (Fig 4A), this means most neutral changes will happen in accordance with the landscape,  
164 and will not result in great stabilizing selection. The other possibility is based on the precision of the rate-parameter estimates.  
165 Even though the OU model was the preferred one, estimated rates of evolution for BM models are remarkably similar to the  
166 ones of the full model S6–S9). Considering that node-specific rates of evolution are calculated under the assumption of a BM  
167 model<sup>2,62</sup>, this could mean that a dense fossil sample in a comprehensive phylogenetic framework might allow for a good  
168 estimation of rates of evolution, even under model violation. Irrespective of which is true (or even if both are), the observation  
169 that most evolutionary rates are compatible with drift is a pattern rarely seen for macroevolutionary data<sup>6–8,53</sup>.

170 Together, these results point to the interplay of genetic variation, selection, and development leading to a homogeneous  
171 macroevolutionary process within a defined subspace. It has been argued that selection can mold genetic patterns of trait  
172 association and variation<sup>29,63,64</sup>, specifically by altering developmental pathways and genetic interactions<sup>65,66</sup>. Conversely,  
173 development has also been argued to impose direct selective pressures (*i.e.* internal selection) by reducing the viability of  
174 non-conforming phenotypes<sup>29,67</sup>, which could, in turn, trickle down to the organization of genetic variation. While in the  
175 present case we can observe this triple alignment between genetics, ontogeny and selection, its origins are harder to decipher.  
176 The ICM was originally described in rodents and later verified in many other Mammalian groups<sup>37–40,68</sup>, suggesting it is the  
177 ancestral condition for molar development in the group. In this case, ontogeny is viewed as the organizing factor behind both  
178 selective patterns and the organization of genetic variation<sup>11</sup>. Furthermore, this explains the near-neutral quality of primate  
179 dental evolution, as conformity to the developmental process would be the main selective pressure on relative tooth sizes<sup>69</sup>.  
180 However, some Mammalian groups have been shown to deviate from the predictions of the ICM to different degrees, suggesting

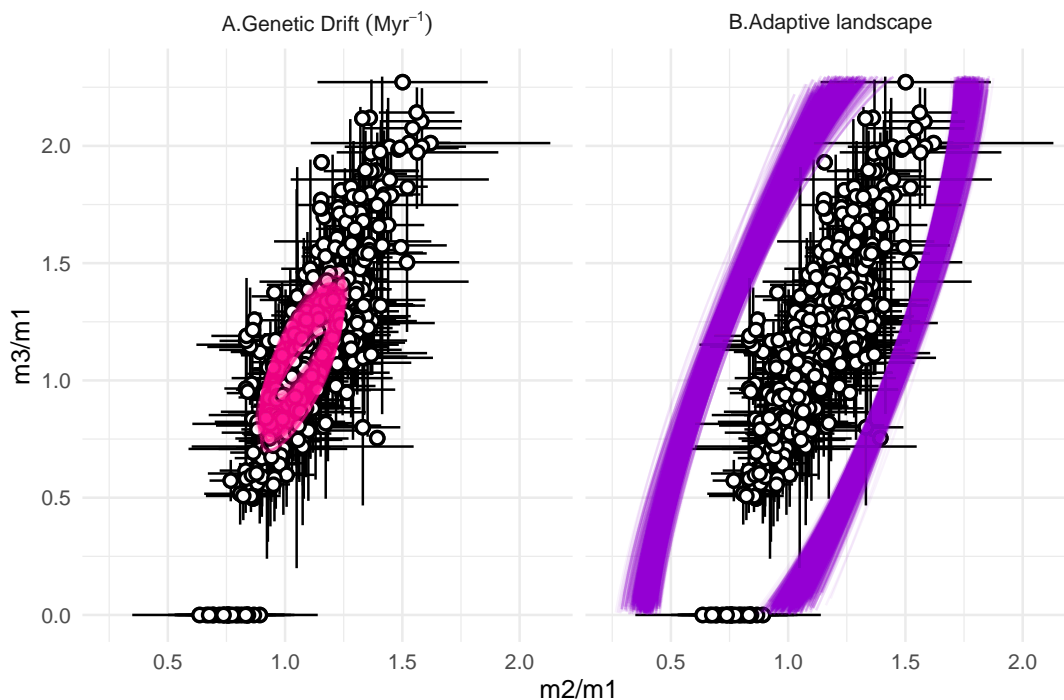

**Figure 4.** Graphical representation of the best selected model ( $OU_{\Sigma \propto G}^D$ ) for the ICM variables based on molar ratios  $m2/m1$  and  $m3/m1$ . Dots are species averages, and horizontal and vertical lines depict  $\pm 1.96$  standard deviations. Ellipses are covariance matrices representing the following parameters of the best model: A. Stochastic rate matrix  $\Sigma$  attributed to the amount of genetic drift introduced in the system every 1 myr. B. Individual adaptive landscape  $\Omega$  based on model estimates for the rate of adaptation towards the optima ( $H$ ). See Materials and Methods for explanations for these parameters. Multiple ellipses were calculated from parameter value combinations that are sampled along the multi-dimensional likelihood contour 2 log-likelihoods away from the peak.

181 that the ontogenetic process itself could be malleable<sup>37,38,68,70,71</sup>. Indeed, it has been argued that molar tooth eruption timing  
182 in Primates is shaped by biomechanical demands at different ontogenetic stages<sup>72</sup>, revealing a possible mechanism through  
183 which external selection could shape development, and indirectly, the morphology of the molar row.

## 184 Conclusions

185 To what degree microevolution can be extended to macroevolution is a central question in evolutionary biology<sup>4</sup>. While there  
186 is little doubt that the fundamental causes at both levels are the same (*e.g.* selection, drift, mutation), efforts to model the  
187 connection have generally failed beyond the qualitative alignment of patterns. When it comes to morphological evolution, the  
188 consensus has been overwhelmingly to reject any straightforward connection between both levels, specifically because of the  
189 fact that empirical evolutionary rates are orders of magnitude inferior to the ones expected by genetic drift<sup>6,7</sup>. The results  
190 presented here reject this consensus, as we show that microevolutionary models can fit well to the data, as long as we choose  
191 the proper morphometric representation. Even the relatively simple task of characterizing the multivariate dimensions of three  
192 molars poses a large number of choices for measurement<sup>10,35,73,91</sup>. Our results suggest that phenotypic quantification based on  
193 evo-devo models maximally narrows the gap between both levels of analysis—and allow for the discovery of the underlying  
194 subspaces that both qualitatively and quantitatively align macroevolutionary patterns with microevolutionary processes.

195 While primate molar seems unique in both the presence of a well-constrained ontogenetic model and abundance of data,  
196 other systems might also fit the requirements for the methods described here. The existence of evolutionary stable developmental  
197 pathways and modules suggests a long history of similarly stable selective pressures<sup>25,65,74,75</sup>. This makes developmental  
198 modules good systems to investigate adaptive landscapes in deep-time<sup>32,58,76</sup>. Furthermore, assuming that these pathways  
199 are shaped by natural selection to optimize the generation of adaptive variation<sup>63–65,74</sup>, they are a likely place to identify  
200 simple connections between micro and macroevolutionary scales<sup>32,58</sup>. So, other evolutionary stable systems are the probable  
201 candidates to verify the connection between scales of organization. Good examples are modules built upon serially homologous



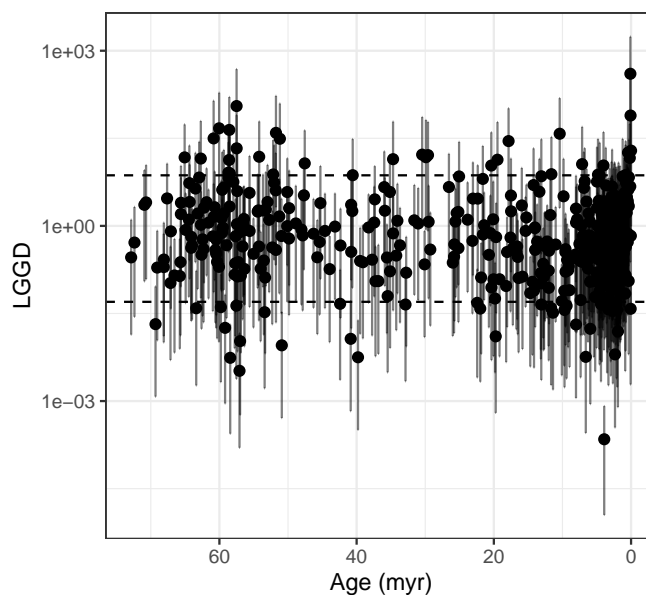

**Figure 5.** Lande's Generalized Genetic Distance (LGGD) used to measure the node-specific rate of evolution throughout Primate divergence and diversification. Dashed lines represent the expected rates under genetic drift. For each node, a distribution of values were calculated by integrating over the variation in heritability, effective population size and generation time. Dots represent the median values and vertical lines at the 95% confidence interval.

202 structures, like limbs, phalanges and vertebrae<sup>77-79</sup>. For more complex structures formed by the interaction of multiple tissues,  
203 it might be harder to devise simple models that sufficiently describe the system ontogeny and variation. However, works that  
204 focus on the Mammalian skull, and that used individualized bone measurements have had a good track-record of modeling  
205 multivariate evolution of these structures under microevolutionary models<sup>12,22,59,80,81</sup>, going even further than the simple  
206 alignment between variation and evolutionary rates<sup>8,53,59</sup>. Since vertebrate skull bones are elements with deep individualized  
207 history, measuring them individually might represent a good first approximation of the multiple morphogenic fields that  
208 interact to form the complete structure. This perspective contrasts with the regular practice of constructing morphospaces  
209 as comprehensive, phenomenological, and statistical descriptors of biological form without a clear connection to underlying  
210 biological processes<sup>19,36,82,83</sup>. However, given that different morphometric methods seem to point to similar overall patterns of  
211 trait variation<sup>84</sup>, finding the correct quantification protocol might be a matter of proper scaling of morphometric variables than a  
212 radical departure from classically established measurement practices.

213 Our investigation also provides a new framework in which developmental biology can be more fully incorporated into  
214 macroevolutionary modeling (Fig. 1). It has long been considered that developmental biology was left out of the evolutionary  
215 synthesis<sup>26,27,58</sup>, and indeed such data are rarely incorporated into comparative analyses. Recent efforts have had different  
216 degrees of success, with many pointing out how complexities of the ontogenetic systems can lead to core violations of the  
217 modern synthesis<sup>26,30,31,58,85</sup>. By reframing the question of microevolutionary model adequacy into a problem of quantification  
218 of biological phenomena<sup>82,83</sup>, we show how evo-devo is essential for a fully unified view in the context of the evolutionary  
219 synthesis.

## 220 Methods

### 221 Sample and morphometrics

222 We used the standard mesiodistal length (MD) and buccolingual breadth (BL) as basic descriptors of each molar. MD and BL  
223 were obtained for each tooth of the lower molar row (m1, m2 and m3). We obtained raw measurements from available datasets  
224 in the literature ( $n=6142$ )<sup>47-49,97-389</sup> and from newly measured museum specimens using a caliper ( $n=150$ ). For rare species,  
225 we took measurements from images that were either published or provided to us ( $n=266$ ). All photos used had a scale and were  
226 digitized using the Fiji software<sup>86</sup>. Only adult and not heavily worn teeth were used in our sample, and each specimen was  
227 measured once. See the supplementary material for a full list of references and sources used for data collection. In total, we  
228 compiled a sample of 6558 individuals distributed among 480 species, divided between 232 extant and 248 extinct species. To  
229 evaluate the evolution of these traits on a phylogenetic framework, we used the most comprehensive phylogeny available that

230 included both living and fossil primate species<sup>50</sup>. Our sample covered all genera and 52.98 % of the species diversity included  
231 in<sup>50</sup>, spanning the full 75 mya of the group's evolution.

232 We constructed three distinct morphospaces to quantify molar variation (Fig. S1). For our biologically naïve representation  
233 of tooth form, we used a “distance space” based on linear distances obtained from each tooth and an “area space” based on each  
234 tooth's occlusal area. Occlusal molar area was approximated using a crown index (BLxMD)<sup>38,68</sup>. Both areas and distances  
235 where log-transformed to normalize the data and reduce the effect of large-sized outliers. For our evo-devo-informed space, we  
236 used the ratios of areas of the second and third molars in relation to the third (m2/m1 and m3/m1, respectively), as defined by  
237 the inhibitory cascade model of molar development<sup>35</sup>. We call this last morphospace the “ICM space”. On each morphospace,  
238 we calculated species averages for comparative analyses. Measurement error was accounted for by calculating the standard  
239 error of each measurement for each species. When a species had a sample of n=1, we assigned a standard error equal to the  
240 pooled within-group standard deviation calculated for all species with sample sizes larger than 30. This implies a very high  
241 measurement error for species known from single specimens, such as the case of many fossils. The degree of genetic association  
242 between traits was approximated both by the intraspecific pooled phenotypic covariance matrix  $P$ , and an independently derived  
243 additive genetic covariance matrix  $G$  obtained from a pedigreed *Papio hamadryas* baboon population<sup>41,42</sup>.

244 To evaluate morphospace patchiness we performed a clustering based on parameterized finite Gaussian mixture models  
245 (GMM)<sup>87</sup>. This method tests for a series of nested models, where groups are modeled as belonging to different multivariate  
246 normal distributions with different group averages. Models differ in the treatment of covariance structures. For example,  
247 covariance matrix of different groups might differ in their volume (trace), shape (proportion of eigenvalues), orientation  
248 (direction of eigenvectors). Furthermore, covariance matrices might be either spherical (zero covariances, equal variances),  
249 diagonal (zero covariances, different variances) or ellipsoidal (non-zero covariances). In total the method tests 14 different  
250 covariance models and finds the best partition of the data and the best covariance models according to the Bayesian Information  
251 Criterion (BIC).

## 252 Phylogenetic comparative methods

253 To model morphological evolution, we used a maximum-likelihood (ML) model selection approach, which fits different  
254 Brownian-motion (BM) and Ornstein-Uhlenbeck (OU) models under a mixed Gaussian phylogenetic models (MGPM)  
255 framework implemented under the R packages PCMBase and PCMfit<sup>88</sup>. This method share some similarities with the GMM  
256 clustering method used above to measure morphospace patchiness. Both GMM and MGPM model the data and allow different  
257 groups to have different parameter values. However, while GMM fits the data to normal distributions in a non-phylogenetic  
258 context, MGPM fits the data according to evolutionary models along a phylogenetic tree. In other words, while the GMM is  
259 a non-phylogenetic clustering methods based on species phenotypic proximity in the morphospaces, MGPM groups species  
260 according to shared evolutionary models and phylogenetic history.

261 Under the MGPM framework, the evolution of a  $p$ -dimensional multivariate trait is modeled as an OU process as follows:

$$262 \quad dx(t) = -H(x(t) - \theta(t))dt + \Sigma_x dW(t) \quad (1)$$

262 where  $H$  is the  $p \times p$  selective rate matrix,  $x(t)$  is a  $p$  vector of trait values at time  $t$ ,  $\theta(t)$  is a  $p$  vector of trait evolutionary optima  
263 at time  $t$ ,  $\Sigma_x$  is the Cholesky factor of the  $p \times p$  stochastic rate matrix  $\Sigma$  (sometimes called evolutionary rate matrix) and  $W(t)$   
264 denotes the  $p$ -dimensional standard Wiener process.

265 Under a strict quantitative genetics interpretation<sup>89</sup>, the diagonal of  $H$  contains the rate of adaptation to the optima of each  
266 trait ( $\alpha_p$ ) and the off-diagonal measures the shape of co-selection among traits. Conversely, the diagonal of  $\Sigma$  contains the rate  
267 of evolution due to drift, with its off-diagonal elements containing the amount of coevolution due to genetic covariation. If  $H$   
268 is a matrix of zeros, the model collapses into a multivariate BM model.

269 Under this microevolutionary perspective,  $\Sigma$  is not an entirely free parameter. Instead, if  $\Sigma$  is the genetic drift parameter,  
270 then it has to be proportional to the additive genetic covariance matrix  $G$  of those traits<sup>90</sup> as follows

$$271 \quad \Sigma = G \frac{t_g}{Ne} \quad (2)$$

271 where  $t_g$  is the time in generations and  $Ne$  is the effective population size. Because  $t_g$  and  $Ne$ , and even the size of  $G$  are hard to  
272 estimate at evolutionary time scales, some have argued for treating  $t_g/Ne$  as a nuisance parameter, reducing the investigation of  
273 drift at the macroevolutionary scale to a simple evaluation of the proportionality between  $\Sigma$  and  $G$ <sup>12,22,54</sup>. Consistent with these  
274 suggestions, here we implement a series of proportionality models, or  $\kappa$ -models<sup>11</sup>, in which  $\Sigma$  is set to be equal to a target  
275 matrix times a scaling factor  $\kappa$ . We used both the intraspecific pooled phenotypic covariance matrix  $P$  and  $G$  as target matrices.  
276 These models are implemented in the package PCMKappa (<https://github.com/FabioLugar/PCMKappa>).

277 Because the proportionality models are more tightly connected to a microevolutionary interpretation of the OU model, we call  
278 them “microevolutionary models”. Full models (models where all parameters are estimated freely) are called “macroevolutionary  
279 models” because they do not have explicit microevolutionary assumptions.

280 We fitted two macroevolutionary BM and OU models and two microevolutionary models, using either  $P$  or  $G$  as a  
281 target matrix, for both BM and OU, totaling six global models (full BM and OU,  $BM_{\Sigma \propto P}$ ,  $BM_{\Sigma \propto G}$ ,  $OU_{\Sigma \propto P}$ ,  $OU_{\Sigma \propto G}$ ) for each  
282 morphospace. For the OU models, we investigated the confidence intervals of the parameters (see Supplementary Material)  
283 to evaluate if the model could be further reduced. Specifically, if the confidence interval of the off-diagonal elements of  $H$   
284 overlapped with 0, another model was fit, setting  $H$  to be a diagonal matrix<sup>88</sup>.

285 In addition, we performed a mixed Gaussian phylogenetic model search, which searches for the combination of regimes,  
286 models and model parameters that best fit the data<sup>88</sup>. For both the mixed model search and model comparison, we used the  
287 BIC, which minimizes parameter inflation due to large samples and is most appropriate for our model-selection question<sup>91</sup> (i.e.  
288 asymptotically identifying the data-generating process as opposed to minimizing trait prediction error). For the mixed gaussian  
289 models, we only fit full BM and OU models, and no  $\kappa$ -model due to software restrictions. Therefore, the mixed models are also  
290 considered macroevolutionary models. All searches where conducted setting the minimum clade size to be five (5) species.

291 To ensure that the  $\kappa$ -models were compatible with microevolutionary processes, we constrained the  $\kappa$  parameter to be  
292 within the range of expected values under drift, as expressed in equation 2. Because  $\Sigma$  is given in the tree (myr) scale, we found  
293 approximations for  $t_g$  and of  $N_e$  for Primates to infer the expected scaling factor  $\kappa$ .  $t_g$  was estimated as  $t_g = 1\text{myr}/g_t$ , where  $g_t$   
294 is the average generation time in years obtained from<sup>45</sup>. Because we lack good estimates of  $g_t$  for fossil species, we used the  
295 phylogenetic average  $\pm$  the standard deviation (SD) throughout the phylogeny. This was done by trimming the dataset to only  
296 the species with  $g_t$  data and obtaining the ancestral value and SD at the base through ML<sup>92</sup>. For  $N_e$  we used 20,000-1,000,000  
297 as the range of possible values consistent with the genomics estimates for multiple primate species and hypothetical common  
298 ancestors<sup>46</sup>. While  $g_t$  and  $N_e$  are expected to vary over the tree, we assumed that the effect of this variation would be at least  
299 partially canceled out by the fact that these two quantities are generally inversely related to each other.

To evaluate the fitted model mechanistically under quantitative genetics theory, we generalized the equation for the adaptive  
landscape<sup>89,93</sup> to the multivariate case as

$$\Omega = H^{-1/2}GH^{-1/2} - P \quad (3)$$

## 300 Rates of evolution

Rates of evolution were used to evaluate if the evolutionary change conforms to the expectation of genetic drift. To calculate  
rates of evolution, we employed Lande’s generalized genetic distance (LGGD,<sup>90</sup>)

$$LGGD = \frac{N_e}{t_g} \Delta z' G^{-1} \Delta z \quad (4)$$

301 where  $\Delta z$  is the phenotypic divergence calculated as the time-standardized phylogenetic independent contrasts (PIC) for each  
302 node<sup>8,62</sup>. We produced a distribution of values for each node by sampling values of  $G$ ,  $N_e$  and  $t_g$  from a uniform distribution  
303 between the range defined above. Confidence intervals for the null hypothesis of drift were generated from simulations based  
304 on equation 2<sup>8</sup>. Values that fall within the bounds of the null-distribution are thought to conform to the expectation under  
305 genetic drift. Values that fall above or below are thought to be indicative of directional or stabilizing selection, respectively.

## 306 References

- 307 1. Dobzhansky, T. *Genetics and the Origin of Species*. 11 (Columbia university press, 1982).
- 308 2. de Santis, M. D. Misconceptions about historical sciences in evolutionary biology. *Evol. biology* **48**, 94–99, DOI:  
309 [10.1007/s11692-020-09526-6](https://doi.org/10.1007/s11692-020-09526-6) (2021).
- 310 3. Stanley, S. M. A theory of evolution above the species level. *Proc. Natl. Acad. Sci. United States Am.* **72**, 646–650, DOI:  
311 [10.1073/pnas.72.2.646](https://doi.org/10.1073/pnas.72.2.646) (1975).
- 312 4. Gould, S. J. *The structure of evolutionary theory* (Harvard University Press, 2002).
- 313 5. Uyeda, J. C., Hansen, T. F., Arnold, S. J. & Pienaar, J. The million-year wait for macroevolutionary bursts. *Proc. Natl.*  
314 *Acad. Sci. United States Am.* **108**, 15908–15913, DOI: [10.1073/pnas.1014503108](https://doi.org/10.1073/pnas.1014503108) (2011).
- 315 6. Houle, D., Bolstad, G. H., van der Linde, K. & Hansen, T. F. Mutation predicts 40 million years of fly wing evolution.  
316 *Nature* **548**, 447–450, DOI: [10.1038/nature23473](https://doi.org/10.1038/nature23473) (2017).
- 317 7. Lynch, M. The rate of morphological evolution in mammals from the standpoint of the neutral expectation. *The Am. Nat.*  
318 **136**, 727–741, DOI: [10.1086/285128](https://doi.org/10.1086/285128) (1990).

- 319 **8.** Machado, F. A., Marroig, G. & Hubbe, A. The pre-eminent role of directional selection in generating extreme morphological  
320 change in glyptodonts (Cingulata; Xenarthra). *Proc. Royal Soc. B: Biol. Sci.* **289**, DOI: [10.1098/rspb.2021.2521](https://doi.org/10.1098/rspb.2021.2521) (2022).
- 321 **9.** Hlusko, L. J. Integrating the genotype and phenotype in hominid paleontology. *Proc. Natl. Acad. Sci. United States Am.*  
322 **101**, 2653–2657, DOI: [10.1073/pnas.0307678101](https://doi.org/10.1073/pnas.0307678101) (2004).
- 323 **10.** Hlusko, L. J., Schmitt, C. A., Monson, T. A., Brasil, M. F. & Mahaney, M. C. The integration of quantitative genetics,  
324 paleontology, and neontology reveals genetic underpinnings of primate dental evolution. *Proc. Natl. Acad. Sci. United*  
325 *States Am.* **113**, 9262–9267, DOI: [10.1073/pnas.1605901113](https://doi.org/10.1073/pnas.1605901113) (2016).
- 326 **11.** Mongle, C. *et al.* Developmental processes mediate alignment of the micro- and macroevolution of primate molars.  
327 *Evolution* **76**, 2975–2985, DOI: [10.1111/evo.14600](https://doi.org/10.1111/evo.14600) (2022).
- 328 **12.** Marroig, G. & Cheverud, J. M. Did natural selection or genetic drift produce the cranial diversification of Neotropical  
329 monkeys? *The Am. Nat.* **163**, 417–428, DOI: [10.1086/381693](https://doi.org/10.1086/381693) (2004).
- 330 **13.** McGlothlin, J. W. *et al.* Adaptive radiation along a deeply conserved genetic line of least resistance in Anolis lizards. *Evol.*  
331 *letters* **2**, 310–322, DOI: [10.1002/evl3.72](https://doi.org/10.1002/evl3.72) (2018).
- 332 **14.** Erwin, D. H. Macroevolution is more than repeated rounds of microevolution. *Evol. & Dev.* **2**, 78–84, DOI: [10.1046/j.1525-142x.2000.00045.x](https://doi.org/10.1046/j.1525-142x.2000.00045.x) (2000).
- 333 **15.** Hautmann, M. What is macroevolution? *Palaeontology* DOI: [10.1111/pala.12465](https://doi.org/10.1111/pala.12465) (2019).
- 334 **16.** Lande, R. The dynamics of peak shifts and the pattern of morphological evolution. *Paleobiology* **12**, 343–354, DOI:  
335 [10.1017/S0094837300003092](https://doi.org/10.1017/S0094837300003092) (1986).
- 336 **17.** Charlesworth, B., Lande, R. & Slatkin, M. A neo-Darwinian commentary on macroevolution. *Evolution* **36**, 474, DOI:  
337 [10.2307/2408095](https://doi.org/10.2307/2408095) (1982).
- 338 **18.** Arnold, S. J., Pfrender, M. E. & Jones, A. G. The adaptive landscape as a conceptual bridge between micro- and  
339 macroevolution. *Genetica* **112-113**, 9–32, DOI: [10.1007/978-94-010-0585-2\\_2](https://doi.org/10.1007/978-94-010-0585-2_2) (2001).
- 340 **19.** Polly, P. D. Developmental dynamics and G-matrices: Can morphometric spaces be used to model phenotypic evolution?  
341 *Evol. biology* **35**, 83–96, DOI: [10.1007/s11692-008-9020-0](https://doi.org/10.1007/s11692-008-9020-0) (2008).
- 342 **20.** Hansen, T. F. Macroevolutionary quantitative genetics? a comment on Polly (2008). *Evol. Biol.* **35**, 182–185 (2008).
- 343 **21.** Melo, D., Porto, A., Cheverud, J. M. & Marroig, G. Modularity: genes, development and evolution. *Annu. review ecology,*  
344 *evolution, systematics* **47**, 463–486, DOI: [10.1146/annurev-ecolsys-121415-032409](https://doi.org/10.1146/annurev-ecolsys-121415-032409) (2016).
- 345 **22.** Machado, F. A. Selection and constraints in the ecomorphological adaptive evolution of the skull of living Canidae  
346 (Carnivora, Mammalia). *The Am. Nat.* **196**, 197–215, DOI: [10.1086/709610](https://doi.org/10.1086/709610) (2020).
- 347 **23.** Laland, K. N. *et al.* The extended evolutionary synthesis: its structure, assumptions and predictions. *Proc. royal society B:*  
348 *biological sciences* **282**, 20151019 (2015).
- 349 **24.** Thompson, D. W. & Thompson, D. W. *On growth and form*, vol. 2 (Cambridge university press Cambridge, 1942).
- 350 **25.** Waddington, C. H. *The strategy of the genes* (Routledge, 1957).
- 351 **26.** Alberch, P., Gould, S. J., Oster, G. F. & Wake, D. B. Size and shape in ontogeny and phylogeny. *Paleobiology* **5**, 296–317,  
352 DOI: [10.1017/S0094837300006588](https://doi.org/10.1017/S0094837300006588) (1979).
- 353 **27.** Alberch, P. Ontogenesis and morphological diversification. *Am. zoologist* **20**, 653–667, DOI: [10.1093/icb/20.4.653](https://doi.org/10.1093/icb/20.4.653) (1980).
- 354 **28.** Love, A. C. Evolutionary morphology, innovation, and the synthesis of evolutionary and developmental biology. *Biol.*  
355 *Philos.* **18**, 309–345 (2003).
- 356 **29.** Cheverud, J. M. Quantitative genetics and developmental constraints on evolution by selection. *J. Theor. Biol.* **110**,  
357 155–171, DOI: [10.1016/s0022-5193\(84\)80050-8](https://doi.org/10.1016/s0022-5193(84)80050-8) (1984).
- 358 **30.** Salazar-Ciudad, I. & Jernvall, J. A computational model of teeth and the developmental origins of morphological variation.  
359 *Nature* **464**, 583–586, DOI: [10.1038/nature08838](https://doi.org/10.1038/nature08838) (2010).
- 360 **31.** Linde-Medina, M. & Diogo, R. Do correlation patterns reflect the role of development in morphological evolution? *Evol.*  
361 *biology* **41**, 494–502, DOI: [10.1007/s11692-014-9275-6](https://doi.org/10.1007/s11692-014-9275-6) (2014).
- 362 **32.** Hether, T. D. & Hohenlohe, P. A. Genetic regulatory network motifs constrain adaptation through curvature in the landscape  
363 of mutational (co)variance. *Evolution* **68**, 950–964, DOI: [10.1111/evo.12313](https://doi.org/10.1111/evo.12313) (2014).
- 364 **33.** Pearson, K. & Davin, A. G. On the biometric constants of the human skull. *Biometrika* **16**, 328, DOI: [10.2307/2331712](https://doi.org/10.2307/2331712)  
365 (1924).
- 366



- 367 **34.** Raup, D. M. Geometric analysis of shell coiling: general problems. *J. paleontology* 1178–1190 (1966).
- 368 **35.** Kavanagh, K. D., Evans, A. R. & Jernvall, J. Predicting evolutionary patterns of Mammalian teeth from development.  
369 *Nature* **449**, 427–432, DOI: [10.1038/nature06153](https://doi.org/10.1038/nature06153) (2007).
- 370 **36.** Alba, V., Carthew, J. E., Carthew, R. W. & Mani, M. Global constraints within the developmental program of the Drosophila  
371 wing. *eLife* **10**, DOI: [10.7554/eLife.66750](https://doi.org/10.7554/eLife.66750) (2021).
- 372 **37.** Asahara, M. Unique inhibitory cascade pattern of molars in canids contributing to their potential to evolutionary plasticity  
373 of diet. *Ecol. Evol.* **3**, 278–285, DOI: [10.1002/ece3.436](https://doi.org/10.1002/ece3.436) (2013).
- 374 **38.** Halliday, T. J. D. & Goswami, A. Testing the inhibitory cascade model in Mesozoic and Cenozoic Mammaliaforms. *BMC*  
375 *Evol. Biol.* **13**, 79, DOI: [10.1186/1471-2148-13-79](https://doi.org/10.1186/1471-2148-13-79) (2013).
- 376 **39.** Bernal, V., Gonzalez, P. & Perez, S. I. Developmental Processes, Evolvability, and Dental Diversification of New World  
377 Monkeys. *Evol. Biol.* **40**, 532–541, DOI: [10.1007/s11692-013-9229-4](https://doi.org/10.1007/s11692-013-9229-4) (2013).
- 378 **40.** Carter, C., & Worthington, S. The evolution of anthropoid molar proportions. *BMC Evol. Biol.* **16**, 18, DOI: [10.1186/s12862-016-0673-5](https://doi.org/10.1186/s12862-016-0673-5) (2016).
- 380 **41.** Hlusko, L. J., Maas, M.-L. & Mahaney, M. C. Statistical genetics of molar cusp patterning in pedigreed baboons:  
381 implications for primate dental development and evolution. *J. Exp. Zool. Part B, Mol. Dev. Evol.* **302**, 268–283, DOI:  
382 [10.1002/jez.b.21](https://doi.org/10.1002/jez.b.21) (2004).
- 383 **42.** Hlusko, L. J., Sage, R. D. & Mahaney, M. C. Modularity in the Mammalian dentition: mice and monkeys share a common  
384 dental genetic architecture. *J. Exp. Zool. Part B, Mol. Dev. Evol.* **316**, 21–49, DOI: [10.1002/jez.b.21378](https://doi.org/10.1002/jez.b.21378) (2011).
- 385 **43.** Hardin, A. M. Genetic correlations in the dental dimensions of *Saguinus fuscicollis*. *Am. J. Phys. Anthropol.* **169**, 557–566  
386 (2019).
- 387 **44.** Hardin, A. M. Genetic correlations in the rhesus macaque dentition. *J. Hum. Evol.* **148**, 102873, DOI: [10.1016/j.jhevol.](https://doi.org/10.1016/j.jhevol.2020.102873)  
388 [2020.102873](https://doi.org/10.1016/j.jhevol.2020.102873) (2020).
- 389 **45.** Pacifici, M. *et al.* Generation length for mammals. *Nat. Conserv.* **5**, 89 (2013).
- 390 **46.** Brevet, M. & Lartillot, N. Reconstructing the history of variation in effective population size along phylogenies. *Genome*  
391 *Biol. Evol.* **13**, DOI: [10.1093/gbe/evab150](https://doi.org/10.1093/gbe/evab150) (2021).
- 392 **47.** Plavcan, J. M. *Sexual dimorphism in the dentition of extant anthropoid Primates*. Ph.D. thesis, Duke University (1990).
- 393 **48.** Godfrey, L. R., Samonds, K. E., Jungers, W. L. & Sutherland, M. R. Teeth, brains, and primate life histories. *Am. J. Phys.*  
394 *Anthropol. The Off. Publ. Am. Assoc. Phys. Anthropol.* **114**, 192–214 (2001).
- 395 **49.** Delson, E., Harcourt-Smith, W. E., Frost, S. R. & Norris, C. A. Databases, data access, and data sharing in paleoanthropol-  
396 ogy: first steps (2007).
- 397 **50.** Wisniewski, A. L., Lloyd, G. T. & Slater, G. J. Extant species fail to estimate ancestral geographical ranges at older nodes  
398 in primate phylogeny. *Proc. Royal Soc. B* **289**, 20212535 (2022).
- 399 **51.** Liam, L. J., Harmon, L. J. & Collar, D. C. Phylogenetic signal, evolutionary process, and rate. *Syst. biology* **57**, 591–601  
400 (2008).
- 401 **52.** Schluter, D. Adaptive radiation along genetic lines of least resistance. *Evolution* **50**, 1766, DOI: [10.2307/2410734](https://doi.org/10.2307/2410734) (1996).
- 402 **53.** Schroeder, L. & von Cramon-Taubadel, N. The evolution of hominoid cranial diversity: A quantitative genetic approach.  
403 *Evolution* **71**, 2634–2649 (2017).
- 404 **54.** Ackermann, R. R. & Cheverud, J. M. Discerning evolutionary processes in patterns of tamarin (genus *Saguinus*) craniofacial  
405 variation. *Am. J. Phys. Anthropol.* **117**, 260–271, DOI: [10.1002/ajpa.10038](https://doi.org/10.1002/ajpa.10038) (2002).
- 406 **55.** Hansen, T. F. Stabilizing selection and the comparative analysis of adaptation. *Evolution* **51**, 1341, DOI: [10.2307/2411186](https://doi.org/10.2307/2411186)  
407 (1997).
- 408 **56.** Mosimann, J. E. Size allometry: Size and shape variables with characterizations of the lognormal and generalized gamma  
409 distributions. *J. Am. Stat. Assoc.* **65**, 930, DOI: [10.2307/2284599](https://doi.org/10.2307/2284599) (1970).
- 410 **57.** Jolicoeur, P. The multivariate generalization of the allometry equation. *Biometrics* **19**, 497–499 (1963).
- 411 **58.** Gould, S. J. *Ontogeny and phylogeny* (Belknap press, 1977).
- 412 **59.** Weaver, T. D., Roseman, C. C. & Stringer, C. B. Close correspondence between quantitative- and molecular-genetic  
413 divergence times for neandertals and modern humans. *Proc. Natl. Acad. Sci. United States Am.* **105**, 4645–4649, DOI:  
414 [10.1073/pnas.0709079105](https://doi.org/10.1073/pnas.0709079105) (2008).



- 415 **60.** Gómez-Robles, A. Dental evolutionary rates and its implications for the neanderthal-modern human divergence. *Sci. Adv.*  
416 **5**, eaaw1268, DOI: [10.1126/sciadv.aaw1268](https://doi.org/10.1126/sciadv.aaw1268) (2019).
- 417 **61.** Monson, T. A., Fecker, D. & Scherrer, M. Neutral evolution of human enamel-dentine junction morphology. *Proc. Natl.*  
418 *Acad. Sci. United States Am.* **117**, 26183–26189, DOI: [10.1073/pnas.2008037117](https://doi.org/10.1073/pnas.2008037117) (2020).
- 419 **62.** Felsenstein, J. Phylogenies and quantitative characters. *Annu. review ecology systematics* **19**, 445–471, DOI: [10.1146/annurev.es.19.110188.002305](https://doi.org/10.1146/annurev.es.19.110188.002305) (1988).
- 421 **63.** Melo, D. & Marroig, G. Directional selection can drive the evolution of modularity in complex traits. *Proc. Natl. Acad. Sci.*  
422 *United States Am.* **112**, 470–475, DOI: [10.1073/pnas.1322632112](https://doi.org/10.1073/pnas.1322632112) (2015).
- 423 **64.** Jones, A. G., Bürger, R., Arnold, S. J., Hohenlohe, P. A. & Uyeda, J. C. The effects of stochastic and episodic movement of  
424 the optimum on the evolution of the g-matrix and the response of the trait mean to selection. *J. Evol. Biol.* **25**, 2210–2231,  
425 DOI: [10.1111/j.1420-9101.2012.02598.x](https://doi.org/10.1111/j.1420-9101.2012.02598.x) (2012).
- 426 **65.** Riedl, R. *Order in living organisms: a systems analysis of evolution* (John Wiley & Sons, 1978).
- 427 **66.** Watson, R. A., Wagner, G. P., Pavlicev, M., Weinreich, D. M. & Mills, R. The evolution of phenotypic correlations and  
428 "developmental memory". *Evolution* **68**, 1124–1138, DOI: [10.1111/evo.12337](https://doi.org/10.1111/evo.12337) (2014).
- 429 **67.** Cheverud, J. The evolution of genetic correlation and developmental constraints. In *Population genetics and evolution*,  
430 94–101 (Springer, 1988).
- 431 **68.** Polly, P. D. Development with a bite. *Nature* **449**, 413–414 (2007).
- 432 **69.** Monson, T. A. *et al.* Evidence of strong stabilizing effects on the evolution of Boreoeutherian (Mammalia) dental  
433 proportions. *Ecol. Evol.* DOI: [10.1002/ece3.5309](https://doi.org/10.1002/ece3.5309) (2019).
- 434 **70.** Varela, L., Tambusso, P. S. & Fariña, R. A. Unexpected inhibitory cascade in the molariforms of sloths (Folivora,  
435 Xenarthra): a case study in xenarthrans honouring gerhard storch's open-mindedness. *Frühförderung interdisziplinär* **76**,  
436 1–16, DOI: [10.37520/fi.2020.002](https://doi.org/10.37520/fi.2020.002) (2020).
- 437 **71.** Sadier, A. *et al.* Growth rate as a modulator of tooth patterning during adaptive radiations. *BioRxiv* DOI: [10.1101/2021.12.](https://doi.org/10.1101/2021.12.05.471324)  
438 [05.471324](https://doi.org/10.1101/2021.12.05.471324) (2021).
- 439 **72.** Glowacka, H. & Schwartz, G. T. A biomechanical perspective on molar emergence and primate life history. *Sci. Adv.* **7**,  
440 eabj0335, DOI: [10.1126/sciadv.abj0335](https://doi.org/10.1126/sciadv.abj0335) (2021).
- 441 **73.** Monson, T. A. *et al.* Keeping 21st century paleontology grounded: Quantitative genetic analyses and ancestral state  
442 reconstruction re-emphasize the essentiality of fossils. *Biology* **11**, DOI: [10.3390/biology11081218](https://doi.org/10.3390/biology11081218) (2022).
- 443 **74.** Riedl, R. A systems-analytical approach to macro-evolutionary phenomena. *The Q. Rev. Biol.* **52**, 351–370 (1977).
- 444 **75.** Houle, D. & Rossoni, D. M. Complexity, evolvability, and the process of adaptation. *Annu. Rev. Ecol. Evol. Syst.* **53**  
445 (2022).
- 446 **76.** Olson, E. C. & Miller, R. L. *Morphological integration* (University of Chicago Press, Chicago and Longon, 1958).
- 447 **77.** Kavanagh, K. D. *et al.* Developmental bias in the evolution of phalanges. *Proc. Natl. Acad. Sci. United States Am.* **110**,  
448 18190–18195, DOI: [10.1073/pnas.1315213110](https://doi.org/10.1073/pnas.1315213110) (2013).
- 449 **78.** Young, N. M., Wislow, B., Takkellapati, S. & Kavanagh, K. Shared rules of development predict patterns of evolution in  
450 vertebrate segmentation. *Nat. communications* **6**, 6690, DOI: [10.1038/ncomms7690](https://doi.org/10.1038/ncomms7690) (2015).
- 451 **79.** Carraco, G., Martins-Jesus, A. P. & Andrade, R. P. The vertebrate embryo clock: Common players dancing to a different  
452 beat. *Front. cell developmental biology* **10**, 944016, DOI: [10.3389/fcell.2022.944016](https://doi.org/10.3389/fcell.2022.944016) (2022).
- 453 **80.** Schroeder, L., Roseman, C. C., Cheverud, J. M. & Ackermann, R. R. Characterizing the evolutionary path(s) to early homo.  
454 *Plos One* **9**, e114307, DOI: [10.1371/journal.pone.0114307](https://doi.org/10.1371/journal.pone.0114307) (2014).
- 455 **81.** Schroeder, L., Elton, S. & Ackermann, R. R. Skull variation in afro- Eurasian monkeys results from both adaptive and  
456 non-adaptive evolutionary processes. *Sci. Reports* **12**, 12516, DOI: [10.1038/s41598-022-16734-x](https://doi.org/10.1038/s41598-022-16734-x) (2022).
- 457 **82.** Bookstein, F. L. Measurement, explanation, and biology: Lessons from a long century. *Biol. theory* **4**, 6–20, DOI:  
458 [10.1162/biot.2009.4.1.6](https://doi.org/10.1162/biot.2009.4.1.6) (2009).
- 459 **83.** Houle, D., Pélabon, C., Wagner, G. P. & Hansen, T. F. Measurement and meaning in biology. *The Q. Rev. Biol.* **86**, 3–34,  
460 DOI: [10.1086/658408](https://doi.org/10.1086/658408) (2011).

- 461 **84.** Machado, F. A., Hubbe, A., Melo, D., Porto, A. & Marroig, G. Measuring the magnitude of morphological integration:  
462 The effect of differences in morphometric representations and the inclusion of size. *Evolution* **73**, 2518–2528, DOI:  
463 [10.1111/evo.13864](https://doi.org/10.1111/evo.13864) (2019).
- 464 **85.** Mitteroecker, P. The developmental basis of variational modularity: Insights from quantitative genetics, morphometrics,  
465 and developmental biology. *Evol. biology* **36**, 377–385, DOI: [10.1007/s11692-009-9075-6](https://doi.org/10.1007/s11692-009-9075-6) (2009).
- 466 **86.** Schindelin, J. *et al.* Fiji: an open-source platform for biological-image analysis. *Nat. methods* **9**, 676–682 (2012).
- 467 **87.** Scrucca, L., Fop, M., Murphy, T. B. & Raftery, A. E. mclust 5: clustering, classification and density estimation using  
468 Gaussian finite mixture models. *The R J.* **8**, 289–317 (2016).
- 469 **88.** Mitov, V., Bartoszek, K. & Stadler, T. Automatic generation of evolutionary hypotheses using mixed gaussian phylogenetic  
470 models. *Proc. Natl. Acad. Sci.* **116**, 16921–16926 (2019).
- 471 **89.** Lande, R. Natural selection and random genetic drift in phenotypic evolution. *Evolution* **30**, 314, DOI: [10.2307/2407703](https://doi.org/10.2307/2407703)  
472 (1976).
- 473 **90.** Lande, R. Quantitative genetic analysis of multivariate evolution, applied to brain:body size allometry. *Evolution* **33**,  
474 402–416, DOI: [10.1111/j.1558-5646.1979.tb04694.x](https://doi.org/10.1111/j.1558-5646.1979.tb04694.x) (1979).
- 475 **91.** Dennis, B., Ponciano, J. M., Taper, M. L. & Lele, S. R. Errors in statistical inference under model misspecification:  
476 evidence, hypothesis testing, and AIC. *Front. ecology evolution* **7**, DOI: [10.3389/fevo.2019.00372](https://doi.org/10.3389/fevo.2019.00372) (2019).
- 477 **92.** Schluter, D., Price, T., Mooers, A. Ø. & Ludwig, D. Likelihood of ancestor states in adaptive radiation. *Evolution* **51**,  
478 1699–1711, DOI: [10.1111/j.1558-5646.1997.tb05095.x](https://doi.org/10.1111/j.1558-5646.1997.tb05095.x) (1997).
- 479 **93.** Hansen, T. F. & Martins, E. P. Translating between microevolutionary process and macroevolutionary patterns: the  
480 correlation structure of interspecific data. *Evolution* **50**, 1404–1417, DOI: [10.1111/j.1558-5646.1996.tb03914.x](https://doi.org/10.1111/j.1558-5646.1996.tb03914.x) (1996).
- 481 **94.** Marroig, G. & Cheverud, J. Size as a line of least resistance II: direct selection on size or correlated response due to  
482 constraints? *Evolution* **64**, 1470–1488, DOI: [10.1111/j.1558-5646.2009.00920.x](https://doi.org/10.1111/j.1558-5646.2009.00920.x) (2010).

## 483 **Supplementary Materials**

### 484 **Contents**

|     |                                            |           |
|-----|--------------------------------------------|-----------|
| 485 | <b>References</b>                          | <b>11</b> |
| 486 | <b>A Morphometrics</b>                     | <b>2</b>  |
| 487 | A.1 Morphospaces .....                     | 2         |
| 488 | A.2 G-matrix .....                         | 3         |
| 489 | <b>B Model comparison</b>                  | <b>5</b>  |
| 490 | B.1 Distance space .....                   | 5         |
| 491 | B.2 Area space .....                       | 5         |
| 492 | B.3 ICM space .....                        | 6         |
| 493 | <b>C Confidence Intervals</b>              | <b>8</b>  |
| 494 | <b>D Phylogenetic Half-lives</b>           | <b>10</b> |
| 495 | <b>E Disparity and phylogenetic signal</b> | <b>11</b> |
| 496 | <b>F Regime-specific disparity</b>         | <b>12</b> |
| 497 | <b>G Supplementary references</b>          | <b>13</b> |
| 498 | <b>References</b>                          | <b>13</b> |
| 499 | <b>H Data source references</b>            | <b>14</b> |
| 500 | <b>References</b>                          | <b>14</b> |

## 501 A Morphometrics

### 502 A.1 Morphospaces

503 We used three morphospaces to test our hypothesis that evo-devo-informed quantification would provide a better bridge between  
504 micro and macroevolution (Fig S1). The first is based on the linear distances taken directly from the teeth, constituting a  
505 6-dimensional space (“distance space”). The second morphospace is based on the occlusal areas of each molar, which were  
506 calculated using a rectangular approximation<sup>38,68</sup>, producing a 3-dimensional space (“area space”). These two spaces are  
507 considered naïve because they make no assumptions about underlying developmental processes. As an evo-devo inspired space,  
508 we used the ICM description of the molar development<sup>35</sup>, and constructed a morphospace based on the relation between the  
509 relative occlusal area of m2 and m3 in relation to m1 (m2/m1 and m3/m1, respectively), resulting in a 2-dimensional space  
510 (“ICM space”). Variables were log-transformed in both the trait and area datasets, but not in the ICM space.

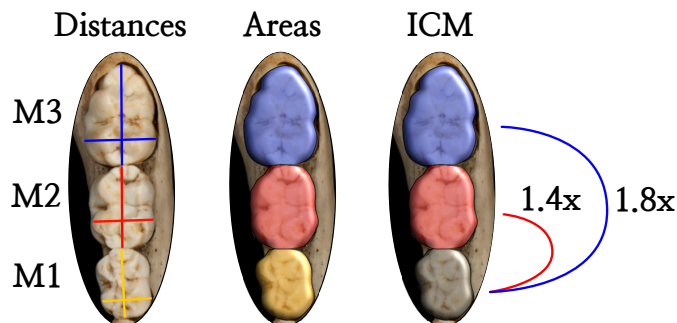

**Figure S1.** Schematic representation of variables used to construct morphospaces. The trait-space was built on the mesiodistal length (MD, vertical) and buccolingual breadth (BL, horizontal) taken from each molar. The area-space was built by estimating the occlusal areas of each molar as the  $A = MD \times BL$ . The ICM-space was built by calculating the relative area size for m2 and m3 in relation to m1.

511 To evaluate morphospace patchiness we performed a clustering based on parameterized finite Gaussian mixture models<sup>87</sup>.  
512 This method test for a series of nested models, where groups are modeled according to different covariance structures that can  
513 be either spherical (all variances equal, no covariances) or ellipsoidal (different variances and non-zero covariances), and can  
514 share or not aspects of their covariance matrices, like size, shape or orientation. The permutation of these aspects produces a  
515 total of 14 total models, which are fitted with an Expectation-Maximization algorithm, and compared through BIC<sup>87</sup>. In the  
516 present case, the best models were the ones in which covariance matrices were ellipsoidal with the same shape, but with either  
517 the same orientation and different volumes (VEE) or the same volume and different orientations (EEV). Specifically, both naïve  
518 spaces showed a preference to the VEE model, whereas the ICM space showed a preference for the EEV model (Fig. S2).  
519 Furthermore, both naïve spaces showed a tendency for finding more groups, with the maximum BIC associated with eight  
520 clusters for linear variables and 5 for areas, while the ICM space preferred only two clusters (Fig. S2).

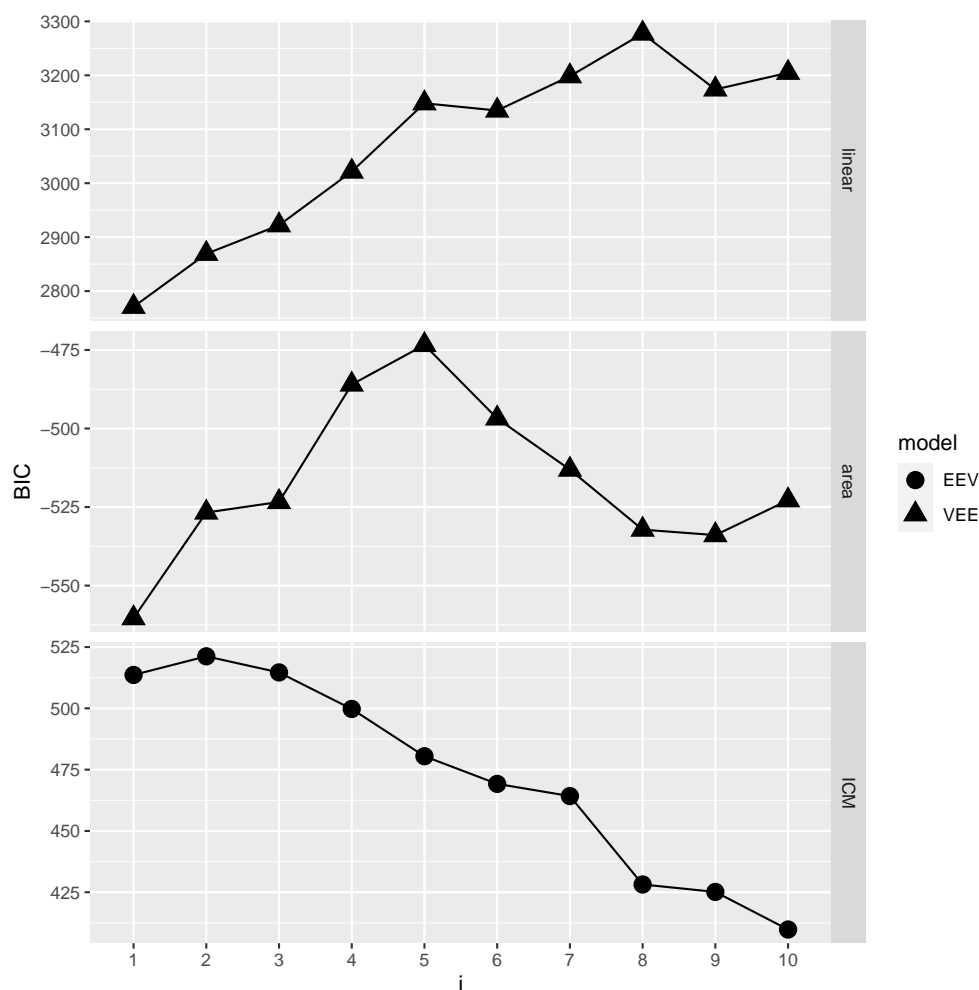

**Figure S2.** BIC values for the Gaussian mixture models for the linear distances, areas and ICM variables for different numbers of clusters ( $i$ ). EEV- Elipsoidal model with the same shape, same volume and different orientations VEE- Elipsoidal model with the same shape, different volumes and same orientation.

521 To visualize these results, we performed a Principal Component Analysis (PCA) on the variance-covariance matrix for the  
 522 full sample on each space. We then inspected the two leading PCs to evaluate the space discontinuity. Because the ICM space  
 523 is only made up of two variables, the leading two PCs represent all variation on the sample. The inspection of the leading PCs,  
 524 and the distribution of the groups found through the clustering analysis show that the naïve spaces are more patchy than the  
 525 ICM space (fig. 2).

526 To visualize these results, we performed a Principal Component Analysis (PCA) on the variance-covariance matrix for the  
 527 full sample on each space. We then inspected the two leading PCs to evaluate the space discontinuity. Because the ICM space  
 528 is only made up of two variables, the leading two PCs represent all variation on the sample. The inspection of the leading PCs,  
 529 and the distribution of the groups found through the clustering analysis show that the naïve spaces are more patchy than the  
 530 ICM space (fig. 2).

## 531 A.2 G-matrix

532 To model the evolution of these traits under quantitative genetics models, we need an estimate of the additive genetic covariance  
 533 matrix  $\mathbf{G}$  for our molar traits. One common practice in comparative analysis is to use the pooled intraspecific phenotypic  
 534 covariance matrix  $\mathbf{P}$  as an approximation of  $\mathbf{G}$ <sup>8,12,22,94</sup>. This is justified on the bases of the high similarity between  $\mathbf{P}$  and  $\mathbf{G}$   
 535 for morphological traits<sup>11,94</sup>. However, given that  $\mathbf{P}$ s contain also non-genetic information, we also used  $\mathbf{G}$  estimated from a  
 536 pedigreed population of baboons as a direct model of the Primate  $\mathbf{G}$ <sup>41</sup>.

537 Because the  $G$  provided by<sup>41</sup> was estimated for the raw, untransformed BL and MD measures, we had to transform it in  
 538 order to match our three morphospaces. We did this through a Monte-Carlo approach, in which we used the published  $G$  and



539 population means to generate  $n = 300$  samples of additive genetic effects. This number of samples was chosen to be compatible  
 540 with effective sample sizes for the pedigreed population, and not over-represent the accuracy of the estimate<sup>41</sup>. For the linear  
 541 distance space, we took the generated genetic effects and log-transformed them. For the area space, we log-transformed the  
 542 product of the effects for each tooth BL and MD. For the ICM space we took the product of the effects for each tooth BL and  
 543 MD and divided the ones relative to m2 and m3 by m1. We then calculated the maximum-likelihood covariance matrix for the  
 544 resulting effects for each space. This procedure was done 10,000 times, and the mean covariance matrix was taken as a point  
 545 estimate of  $G$  for the lower-dimensionality morphospaces (area and ICM spaces).

546 To test the validity of this approach we compared the simulation results to the analytic approximation for covariance  
 547 matrices of products of random variables. Specifically, we investigated if the covariance matrix obtained for the product of the  
 548 additive effect for each tooth BL and MD (area space) are similar to what would be expected analytically as

$$\sigma_{xy}^2 = \mu_x^2 \sigma_y^2 + \mu_y^2 \sigma_x^2 + (\sigma_{xy})^2 + 2\mu_x \mu_y \sigma_{xy} + \sigma_x^2 \sigma_y^2 \quad (S1)$$

$$\sigma_{xy,uv}^2 = \mu_x \mu_u \sigma_{y,v} + \mu_x \mu_v \sigma_{y,u} + \mu_y \mu_u \sigma_{x,v} + \mu_y \mu_v \sigma_{x,u} + \sigma_{xu} \sigma_{yv} \sigma_{yu} \quad (S2)$$

549 where  $\mu$  are means,  $\sigma^2$  variances and  $\sigma$  are covariances for the random variables  $x, y, u$  and  $v$ <sup>91</sup>. Variable pairs  $x:y$  and  $u:v$  are  
 550 BL and MD variable pairs for each tooth. From these equations we were able to construct the covariance matrix for the area  
 551 space on a  $cm^2$  scale. This procedure was done only for this non-log area space as a proof-of-concept and to limit the number  
 552 of assumptions necessary to derived log-scale and ratio spaces.

553 To compare analytical and Monte-Carlo estimates of  $G$  we first mean-scaled both matrices as follows:

$$\Sigma_{\mu} = \Sigma \oslash \bar{z}\bar{z}^t \quad (S3)$$

554 where  $\Sigma$  is the original covariance matrix,  $\oslash$  is the element-wise product and  $\bar{z}$  is a vector of means<sup>20</sup>. We then calculated the  
 555 absolute differences from each Monte-Carlo sample of these standardized matrices. Differences in the variances on these  
 556 matrices are equal to the difference in coefficient of variation between matrices, and thus provide a dimensionless scale of  
 557 comparison.

558 The results show that matrices are extremely similar, with a slight bias for covariances being higher on the Monte Carlo  
 559 samples (fig. S3). Despite this, all absolute differences are very small ( $< 0.002$ ), suggesting that differences are negligible. A  
 560 matrix correlation analysis reinforced this interpretation, showing values  $> 0.97$  for all samples. Together, these results suggest  
 561 that the Monte Carlo estimates are a reliable approximation for the covariance on lower dimensionalities.

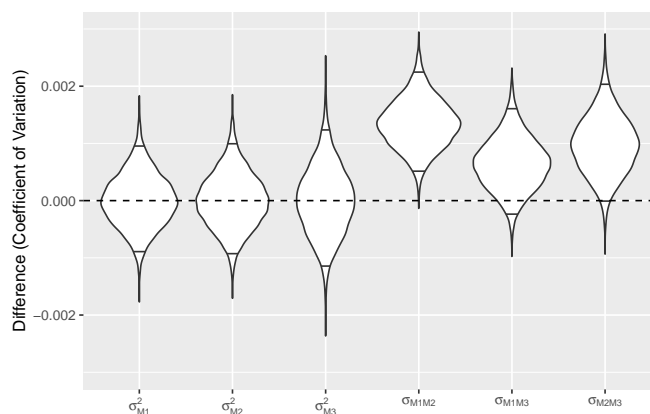

**Figure S3.** Differences between the Monte Carlo sampling approach for generating covariances for areas and the analytical approximation. Horizontal lines within violins highlights the 95% interval for each matrix cell.

## 562 B Model comparison

563 We performed model comparison under the maximum likelihood framework of the Phylogenetic mixed Gaussian models<sup>88, 92</sup>.  
564 This framework has some desirable features. First, it incorporates both measurement errors and missing data during the model  
565 fitting procedure. The latter is especially important in our case due to the abundance of fossil taxa in our sample and the  
566 presence of species lacking m3s, such as callitrichines and the fossil *Xenothrix mcgregori*. Second, it takes into account process  
567 heterogeneity along the tree, allowing regimes to be under different kinds of models and parameter combinations. Lastly, the  
568 parameters of the fitted model can be interpreted under quantitative genetics theory in terms of genetic drift and stabilizing  
569 selection<sup>55</sup>.

570 To test our hypothesis, we fit global models that included some microevolutionary assumptions ( $\kappa$ -models) and some that  
571 did not. Evidence supporting  $\kappa$ -models could then be seen as evidence for a microevolutionary interpretation of the data. For  
572 each morphometric space, we fitted regular BM and OU models, as well as two  $\kappa$  versions of these models. For these models,  
573 the rate matrix  $\Sigma$  was set to be proportional to either  $P$  or  $G$ . We also performed mixed model heuristic searches, which try to  
574 find the best regime combination for a given tree, allowing for regimes to be under different model types (BM or OU). For each  
575 space, we conducted 10 searches and recorded the result with the lowest BIC. Lastly, in addition to the heuristic result, we  
576 tested mixed models with pre-determinate regime shifts based on Fig. 3 which is the best result for the area morphospace. This  
577 regime was chosen as a common point of reference to compare the effect of model and parameter heterogeneity on the fitting  
578 process.

### 579 B.1 Distance space

580 For the distance space only 6 out of 10 heuristic searches converged. Nevertheless, they all produced better BIC values than any  
581 global model (table S1). The best model (Search 5) was a multi-rate BM model, with two regimes, one for Simiiformes and one  
582 for the remaining of the tree (Fig. S4A). This model deviates from the best model chosen to represent the rate heterogeneity on  
583 the other spaces by essentially fusing the ancestral and the Strepsirrhini regimes into one (Fig. 3). In terms of model parameters,  
584 this model performed similarly to the tree-regime one in the sense that the ancestral regime had higher rates of evolution than  
585 the Simiiformes one (see below fig 5).

586 Despite the best model being different than the one described in the main text, Search 4 produced a regime combination  
587 that was essentially identical to the one for areas (Fig. S4B). Even though the BIC was worse than the best model, this run  
588 performed better than any of the global models and is therefore adequate to highlight how this morphospace favors more  
589 heterogeneous models instead of global ones.

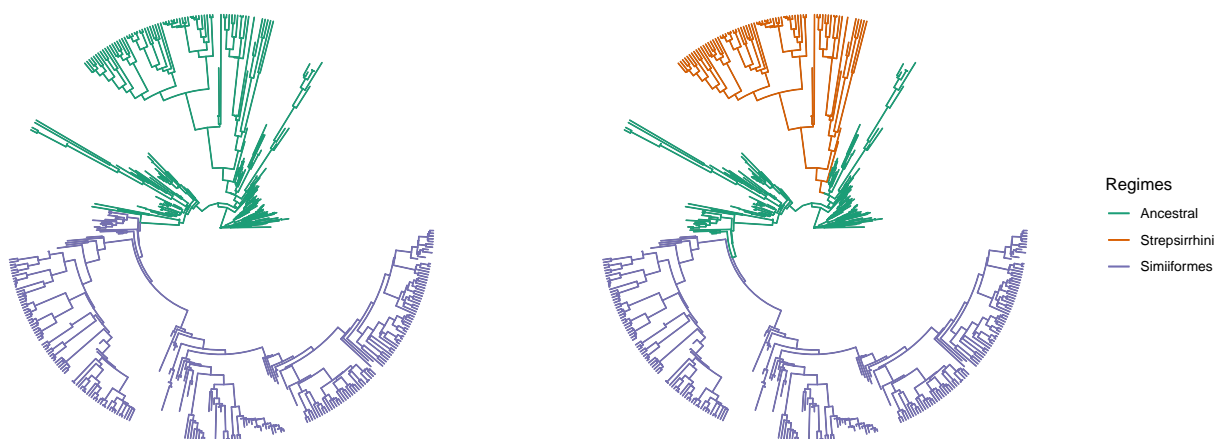

**Figure S4.** Regimes for different runs of the heuristic search. A- Best model (Search 5). B- Model compatible with the best model for areas (Fig. 3)

### 590 B.2 Area space

591 For the area space, 9 out of the 10 heuristic searches converged. The best mixed model (Search 7) and the best overall model  
592 was a multi-rate BM model with three regimes, as described in the main text (Fig. 3).

### 593 B.3 ICM space

594 For the ICM space, all 10 heuristic searches converged. From these, four runs produced the same result as the global OU model  
 595 (table S3), suggesting an absence of model shifts for this space. The global fits show that both OU and BM models are equally  
 596 good fits to the data and that the addition of the microevolutionary assumption of proportionality between  $\Sigma$  and  $G$  for the  
 597 global OU model produces a slightly superior model ( $OU_{\Sigma \propto G}$ ). Although all three models seem to provide a good fit to the data,  
 598 the investigation of confidence intervals for parameters of the OU models shows that the confidence interval of the off-diagonal  
 599 element of  $H$  overlaps with zero (tables S6,S7), suggesting that this parameter can be excluded from the model (see below).

600 A model that omits the off-diagonal elements of  $H$  is implemented as a default model in the PCMfit package<sup>88</sup>. We chose  
 601 not to include those models initially because our data is rich enough to estimate parameters from even fairly complex models.  
 602 Instead, we chose to fit the most complex model and perform *post-hoc* model simplification. Using a  $\kappa$ -OU model with a  
 603 diagonal  $H$  produces a model with vastly superior BIC ( $OU_{\Sigma \propto G}^d$ ). The removal of the off-diagonal elements of  $H$  did not change  
 604 significantly the parameter estimates (table S9,S8). Lastly, although  $OU^d$  and  $OU_{\Sigma \propto G}^d$  had similar BICs, the confidence interval  
 605 for all common parameters showed great overlap, suggesting that both models are equivalent. Furthermore, the  $OU_{\Sigma \propto G}^d$  model  
 606 had tighter confidence intervals, fewer parameters and a slightly larger BIC. For these reasons, we chose this as the best model  
 607 for our data.

**Table S1.** Comparison of models of the linear distance morphospace fit through Maximum Likelihood.

| Model <sup>a</sup>      | $N_p$ <sup>b</sup> | logLik <sup>c</sup> | BIC <sup>d</sup> |
|-------------------------|--------------------|---------------------|------------------|
| BM                      | 27                 | 2585.03             | -5112.72         |
| OU                      | 54                 | 2684.57             | -5247.16         |
| $BM_{\Sigma \propto P}$ | 7                  | 2108.57             | -4202.91         |
| $OU_{\Sigma \propto P}$ | 34                 | 2174.45             | -4275.55         |
| $BM_{\Sigma \propto G}$ | 7                  | 1480.63             | -2947.02         |
| $OU_{\Sigma \propto G}$ | 34                 | 1510.57             | -2947.79         |
| Search 1                | 78                 | 2788.91             | -5391.08         |
| Search 2                | 51                 | 2796.77             | -5479.14         |
| Search 3                | 97                 | 2868.67             | -5493.57         |
| Search 4                | 74                 | 2823.03             | -5470.65         |
| Search 5                | 51                 | 2878.96             | <b>-5643.53</b>  |
| Search 6                | 78                 | 2820.77             | -5454.80         |

<sup>a</sup>Model type; either global BM or OU (full or  $\kappa$  models) or a search run of mixed model.

<sup>b</sup>Number of model parameters.

<sup>c</sup>Log-likelihood of the model.

<sup>d</sup>Bayesian Information Criterion used for model comparison. Bold represents the best models, while underline represents the ones with BIC 2 units away from the best model.

**Table S2.** Comparison of models of the area morphospace fit through Maximum Likelihood.

| Model <sup>a</sup>                          | $N_p$ <sup>b</sup> | logLik <sup>c</sup> | BIC <sup>d</sup> |
|---------------------------------------------|--------------------|---------------------|------------------|
| BM                                          | 9                  | 415.80              | -813.21          |
| OU                                          | 18                 | 413.98              | -790.47          |
| BM <sub><math>\Sigma \propto P</math></sub> | 4                  | 92.39               | -176.70          |
| OU <sub><math>\Sigma \propto P</math></sub> | 13                 | 275.16              | -523.54          |
| BM <sub><math>\Sigma \propto G</math></sub> | 4                  | 74.41               | -140.74          |
| OU <sub><math>\Sigma \propto G</math></sub> | 13                 | 258.02              | -489.26          |
| Search 1                                    | 10                 | 413.61              | -806.75          |
| Search 2                                    | 10                 | 414.98              | -809.48          |
| Search 3                                    | 19                 | 420.25              | -800.85          |
| Search 4                                    | 10                 | 415.85              | -811.23          |
| Search 5                                    | 18                 | 434.43              | -831.37          |
| Search 6                                    | 26                 | 469.34              | -883.58          |
| Search 7                                    | 26                 | 471.42              | <b>-887.74</b>   |
| Search 8                                    | 10                 | 415.17              | -809.87          |
| Search 9                                    | 27                 | 448.71              | -840.08          |

<sup>a</sup>Model type; either global BM or OU (full or  $\kappa$  models) or a search run of mixed model.

<sup>b</sup>Number of model parameters.

<sup>c</sup>Log-likelihood of the model.

<sup>d</sup>Bayesian Information Criterion used for model comparison. Bold represents the best models, while underline represents the ones with BIC 2 units away from the best model.

**Table S3.** Comparison of models of the ICM morphospace fit through Maximum Likelihood.

| Model <sup>a</sup>                                       | $N_p$ <sup>b</sup> | logLik <sup>c</sup> | BIC <sup>d</sup> |
|----------------------------------------------------------|--------------------|---------------------|------------------|
| BM                                                       | 5                  | 589.16              | -1147.46         |
| OU                                                       | 10                 | 604.53              | -1147.33         |
| OU <sup>d</sup>                                          | 9                  | 604.56              | <u>-1153.55</u>  |
| BM <sub><math>\Sigma \propto P</math></sub>              | 3                  | 538.31              | -1058.10         |
| OU <sub><math>\Sigma \propto P</math></sub>              | 8                  | 584.68              | -1119.98         |
| BM <sub><math>\Sigma \propto G</math></sub>              | 3                  | 575.69              | -1132.86         |
| OU <sub><math>\Sigma \propto G</math></sub>              | 8                  | 598.96              | -1148.53         |
| OU <sub><math>\Sigma \propto G</math></sub> <sup>d</sup> | 7                  | 598.54              | <b>-1153.86</b>  |
| Three-regime OU                                          | 26                 | 597.35              | -1034.18         |
| Search 1                                                 | 10                 | 604.56              | -1147.37         |
| Search 2                                                 | 15                 | 618.60              | -1144.59         |
| Search 3                                                 | 15                 | 618.56              | -1144.52         |
| Search 4                                                 | 15                 | 617.78              | -1142.95         |
| Search 5                                                 | 10                 | 604.55              | -1147.37         |
| Search 6                                                 | 15                 | 617.80              | -1142.99         |
| Search 7                                                 | 10                 | 604.56              | -1147.37         |
| Search 8                                                 | 6                  | 589.16              | -1141.28         |
| Search 9                                                 | 10                 | 604.55              | -1147.36         |
| Search 10                                                | 15                 | 617.80              | -1143.00         |

<sup>a</sup>Model type; either global BM or OU (full or  $\kappa$  models) or a search run of mixed model.

<sup>b</sup>Number of model parameters.

<sup>c</sup>Log-likelihood of the model.

<sup>d</sup>Bayesian Information Criterion used for model comparison. Bold represents the best models, while underline represents the ones with BIC 2 units away from the best model.

## 608 C Confidence Intervals

609 Confidence intervals for model parameters and derived statistics were obtained by exploring the likelihood surface and  
 610 getting parameter combinations from models that were 2 log-likelihood units away from the peak. This was done using the  
 611 “dentist” package (<https://github.com/bomeara/dentist>), which allows the exploration of the likelihood surface  
 612 by “denting” of the surface- setting the region around the peak to have extremely low likelihoods and sampling on the resulting  
 613 contour around the dented peak. We used 10,000 steps to sample the likelihood surface and obtain confidence intervals  
 614 simultaneously for all parameters for models fit on the ICM morphospace. If maximum and minimum values sampled by the  
 615 “denting” approach matched the confidence intervals, then the sampling did not encompass the true confidence interval, and the  
 616 sampling range had to be expanded. Below we report both the confidence interval as well the extreme values examined to show  
 617 that adequate confidence intervals are being reported.

618 For the OU and  $OU_{\Sigma \propto G}$  models, the off-diagonal elements of the  $H$  matrix ( $H_{1,2}$ ) have confidence intervals that overlap  
 619 with 0, suggesting that this parameter can be omitted from the model (table S6, S7). The removal of the  $H_{1,2}$  from the model  
 620 did not change substantially parameter estimates (table S8, S9), nor did it reduce the likelihoods of the models, improving  
 621 BIC scores (table S3). All models showed a great overlap in the common parameters (table S6–S9). This is also true for the  
 622 reconstructed  $\Sigma$  matrix for the *kappa* models. Specifically, for  $OU_{\Sigma \propto G}^d$ ,  $\Sigma$  confidence intervals are  $\Sigma_{1,1} = 0.0243 - 0.0276$ ,  
 623  $\Sigma_{1,2} = 0.0324 - 0.0368$  and  $\Sigma_{2,2} = 0.0666 - 0.0756$ , placing them within the expected for the  $OU_{\Sigma \propto G}$  model.

**Table S4.** Confidence interval for the BM model. Lower and upper CI- parameters that are 2 log-likelihood units away from the ML estimate. Lowest and Highest examined values- Extreme values examined by the “denting” approach.

|                  | best  | lower CI | upper CI | lowest examined | highest examined |
|------------------|-------|----------|----------|-----------------|------------------|
| $X0_1^a$         | 1.086 | 0.993    | 1.184    | 0.801           | 1.200            |
| $X0_2^a$         | 1.184 | 1.003    | 1.364    | 0.801           | 1.599            |
| $\Sigma_{1,1}^b$ | 0.018 | 0.016    | 0.020    | 0.010           | 0.499            |
| $\Sigma_{1,2}^b$ | 0.030 | 0.026    | 0.032    | 0.010           | 0.498            |
| $\Sigma_{2,2}^b$ | 0.071 | 0.065    | 0.077    | 0.010           | 0.497            |

<sup>a</sup>Ancestral state at the root

<sup>b</sup>Entries of the rate matrix.

**Table S5.** Confidence interval for the  $BM_{\Sigma \propto G}$  model. Lower and upper CI- parameters that are 2 log-likelihood units away from the ML estimate. Lowest and Highest examined values- Extreme values examined by the “denting” approach.

|            | best  | lower CI | upper CI | lowest examined | highest examined |
|------------|-------|----------|----------|-----------------|------------------|
| $X0_1^a$   | 1.090 | 0.983    | 1.195    | 0.800           | 1.200            |
| $X0_2^b$   | 1.182 | 1.005    | 1.348    | 0.800           | 1.593            |
| $\kappa^b$ | 0.361 | 0.317    | 0.413    | 0.102           | 0.899            |

<sup>a</sup>Ancestral state at the root

<sup>b</sup>Proportionality constant between the target matrix ( $G$ -matrix) and  $\Sigma$ .



**Table S6.** Confidence interval for the OU model. Lower and upper CI- parameters that are 2 log-likelihood units away from the ML estimate. Lowest and Highest examined values- Extreme values examined by the “denting” approach.

|                  | best   | lower CI | upper CI | lowest examined | highest examined |
|------------------|--------|----------|----------|-----------------|------------------|
| $X_{01}^a$       | 1.132  | 1.008    | 1.200    | 0.801           | 1.200            |
| $X_{02}^a$       | 1.306  | 1.075    | 1.466    | 0.804           | 1.597            |
| $H_{1,1}^b$      | 0.034  | 0.025    | 0.043    | 0.010           | 0.498            |
| $H_{1,2}^b$      | -0.214 | -0.485   | 0.473    | -0.490          | 0.498            |
| $H_{2,2}^b$      | 0.031  | 0.021    | 0.040    | 0.010           | 0.498            |
| $\theta_1^c$     | 1.064  | 1.012    | 1.115    | 0.808           | 1.198            |
| $\theta_2^c$     | 1.066  | 0.971    | 1.175    | 0.801           | 1.593            |
| $\Sigma_{1,1}^d$ | 0.022  | 0.020    | 0.025    | 0.010           | 0.495            |
| $\Sigma_{1,2}^d$ | 0.034  | 0.030    | 0.036    | 0.010           | 0.500            |
| $\Sigma_{2,2}^d$ | 0.080  | 0.074    | 0.086    | 0.010           | 0.498            |

<sup>a</sup>Ancestral state at the root

<sup>b</sup>Entries of the **H**-matrix

<sup>c</sup>Multivariate optima

<sup>d</sup>Entries of the rate matrix

**Table S7.** Confidence interval for the  $OU_{\Sigma \propto G}$  model. Lower and upper CI- parameters that are 2 log-likelihood units away from the ML estimate. Lowest and Highest examined values- Extreme values examined by the “denting” approach.

|              | best  | lower CI | upper CI | lowest examined | highest examined |
|--------------|-------|----------|----------|-----------------|------------------|
| $X_{01}^a$   | 1.097 | 0.966    | 1.192    | 0.800           | 1.199            |
| $X_{02}^a$   | 1.232 | 1.031    | 1.376    | 0.802           | 1.599            |
| $\kappa^b$   | 0.486 | 0.416    | 0.553    | 0.101           | 0.894            |
| $H_{1,1}^c$  | 0.049 | 0.037    | 0.057    | 0.010           | 0.499            |
| $H_{1,2}^c$  | 0.226 | -0.352   | 0.469    | -0.497          | 0.500            |
| $H_{2,2}^c$  | 0.024 | 0.013    | 0.035    | 0.010           | 0.499            |
| $\theta_1^d$ | 1.066 | 1.027    | 1.106    | 0.800           | 1.198            |
| $\theta_2^d$ | 1.058 | 0.885    | 1.175    | 0.802           | 1.597            |

<sup>a</sup>Ancestral state at the root

<sup>b</sup>Proportionality constant between the target matrix (**G**-matrix) and  $\Sigma$ .

<sup>c</sup>Entries of the **H**-matrix

<sup>d</sup>Multivariate optima

**Table S8.** Confidence interval for the  $OU^d$  model. Lower and upper CI- parameters that are 2 log-likelihood units away from the ML estimate. Lowest and Highest examined values- Extreme values examined by the “denting” approach.

|                  | best  | lower CI | upper CI | lowest examined | highest examined |
|------------------|-------|----------|----------|-----------------|------------------|
| $X_{01}^a$       | 1.102 | 1.012    | 1.192    | 0.801           | 1.199            |
| $X_{02}^a$       | 1.248 | 1.068    | 1.428    | 0.800           | 1.592            |
| $H_{1,1}^b$      | 0.036 | 0.025    | 0.043    | 0.010           | 0.499            |
| $H_{2,2}^b$      | 0.031 | 0.019    | 0.039    | 0.010           | 0.499            |
| $\theta_1^c$     | 1.066 | 1.016    | 1.112    | 0.801           | 1.200            |
| $\theta_2^c$     | 1.073 | 0.969    | 1.211    | 0.808           | 1.585            |
| $\Sigma_{1,1}^d$ | 0.022 | 0.020    | 0.025    | 0.010           | 0.498            |
| $\Sigma_{1,2}^c$ | 0.033 | 0.030    | 0.036    | 0.010           | 0.499            |
| $\Sigma_{2,2}^c$ | 0.079 | 0.073    | 0.084    | 0.010           | 0.499            |

<sup>a</sup>Ancestral state at the root

<sup>b</sup>Entries of the **H**-matrix

<sup>c</sup>Multivariate optima

<sup>d</sup>Entries of the rate matrix

**Table S9.** Confidence interval for the  $OU_{\Sigma \propto G}^d$  model. Lower and upper CI- parameters that are 2 log-likelihood units away from the ML estimate. Lowest and Highest examined values- Extreme values examined by the “denting” approach.

|              | best  | lower CI | upper CI | lowest examined | highest examined |
|--------------|-------|----------|----------|-----------------|------------------|
| $XO_1^a$     | 1.107 | 0.963    | 1.190    | 0.800           | 1.200            |
| $XO_2^a$     | 1.232 | 1.036    | 1.393    | 0.800           | 1.598            |
| $\kappa^b$   | 0.484 | 0.416    | 0.536    | 0.101           | 0.900            |
| $H_{1,1}^c$  | 0.044 | 0.034    | 0.050    | 0.010           | 0.498            |
| $H_{1,2}^c$  | 0.025 | 0.013    | 0.037    | 0.010           | 0.495            |
| $\theta_1^d$ | 1.066 | 1.029    | 1.109    | 0.800           | 1.200            |
| $\theta_2^d$ | 1.063 | 0.917    | 1.209    | 0.802           | 1.594            |

<sup>a</sup>Ancestral state at the root

<sup>b</sup>Proportionality constant between the target matrix (**G**-matrix) and  $\Sigma$ .

<sup>c</sup>Entries of the **H**-matrix

<sup>d</sup>Multivariate optima

## 624 D Phylogenetic Half-lives

625 The investigation of the adaptive landscape implied by the best model shows a corridor-like topography (Fig. 4), suggesting that  
 626 selection is relaxed along the activation-inhibition axis and intensified against deviations from the ICM. To further verify this  
 627 without assuming a microevolutionary model, we calculated the phylogenetic half-lives ( $t_{1/2}$ ) along the activation-inhibition  
 628 gradient and the deviations from the ICM.  $t_{1/2}$  measures the time it takes for the phenotype to move halfway in the direction of  
 629 the optimum and is calculated as

$$t_{1/2} = \ln(2)/\alpha \quad (S4)$$

630 with  $\alpha$  being the rate of adaptation for each trait given by the diagonal of the  $H$  matrix<sup>55</sup>. Because  $H$  is given as a function of  
 631 the original traits (m2/m1 and m3/m1) we have to perform a rotation of the original matrix into the eigenvectors of the adaptive  
 632 landscape as

$$H' = V^t H V \quad (S5)$$

633 were  $V$  are the eigenvectors of  $\Omega$  (see equation 3).  $t_{1/2}$  were calculated integrating over the confidence limits of parameters. In  
 634 addition to the rotated space, we also calculated  $t_{1/2}$  on the original space. This was done to evaluate an additional hypothesis  
 635 of the ICM process that m3s, because they develop last, are under less intense stabilizing selection<sup>11</sup>.

636 The results for molar ratios are in line with this prediction, as the half-life for m3/m1 is considerably larger than for m2/m1,  
 637 suggesting a stronger selection on the latter than in the former (fig S5). For the components of the ICM, results are compatible  
 638 with the expected for a corridor-like adaptive landscape, with half-lives along the activation-inhibition gradient being higher  
 639 than on the one for deviations from the ICM (fig S5). This suggests that selection against deviations from ICM is far stronger  
 640 than the ones along the activation-inhibition gradient, allowing the near-neutral evolution within the adaptive corridor. An  
 641 inspection of the evolutionary trait-grams of these variables reinforces this idea, as deviations from the ICM are more tightly  
 642 confined around the optima, and evolution along the activation-inhibition gradient seems greater in amplitude (fig S6).

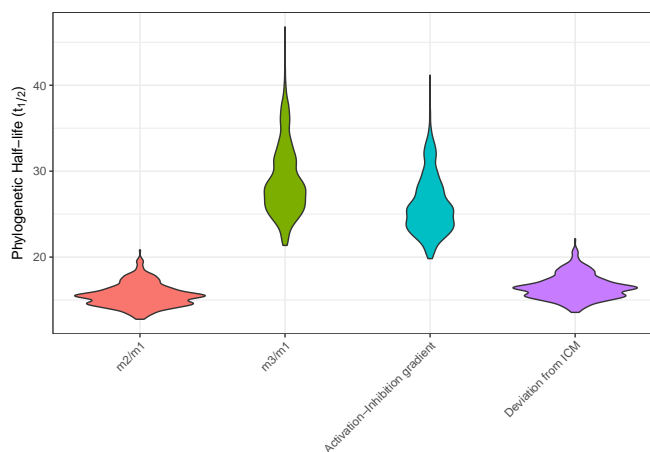

**Figure S5.** Phylogenetic half life for ICM ratios (m2/m1 and m3/m1) and components of the ICM model (Activation-Inhibition gradient and deviations from the ICM).

## 643 E Disparity and phylogenetic signal

644 To illustrate the effect of stabilizing selection on both overall disparities in the sample and phylogenetic signal, we employed  
645 a simulation approach. We generated tip data using the phylogenetic tree and the best evolutionary model in two situations.  
646 In one, we used the whole model to produce data under an OU model; in another, we set the  $H$  matrix to be 0, producing a  
647 BM model with the same rate parameters as the OU model. For each model, we generated 1,000 datasets, and for each of  
648 these datasets, we extracted the overall disparity and the phylogenetic signal. The disparity was calculated simply as the sum  
649 of variances in the tip data, as a measure of overall morphospace occupancy<sup>93</sup>. For Phylogenetic signal, we employed the  
650 multivariate version of Blomberg's  $K$ <sup>94,95</sup>. Results from the simulations show the expected pattern, with the BM model showing  
651 higher disparity and phylogenetic signal than the OU model (Fig. S7). Because these simulations are based on our preferred  
652 microevolutionary model ( $OU_{\Sigma \propto G}^d$ ), the BM represents what would take place under a pure genetic drift process, while the  
653 OU model represents the action of stabilizing selection in modulating the action of drift. So, despite the fact that most of the  
654 divergence within the group is compatible with drift (Figure 5), drift alone would produce a wider range of phenotypic values  
655 (Fig. S7A, left panel), thus requiring the action of stabilizing selection to not only constrain the total amount of divergence, but  
656 also to shape the pattern distribution of phenotypes (Fig. S7A, right panel).

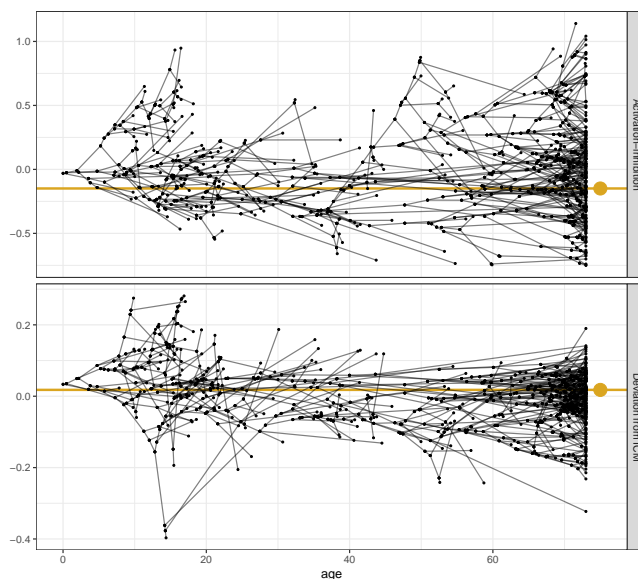

**Figure S6.** Traitgrams of the components of the ICM for primates. Black lines represents the phylogeny mapped to measured trait values (black points) and golden lines and dots represents each trait optimum.

## 657 **F Regime-specific disparity**

658 To compare the disparity-generating potential of different regimes of the mixed-model depicted in Fig. 3, we employed a  
659 simulation approach. Specifically, we took each model for each regime and simulated phenotypic evolution according to that  
660 model on a star-phylogeny of equal size to the full phylogeny. This was done to standardize differences in tree structure,  
661 species sample size and model differences (BM or OU) between regimes. Simulations were performed 100 times, and for each  
662 run we computed the disparity of the simulated tip data. This was done for the three-regime model for each morphospace.  
663 Higher and lower values of disparity indicate a less or more constrained evolution, respectively. Results show that, for all  
664 spaces, the ancestral regime is less constrained than the Strepsirrhini and Simiiform regimes (Fig. S8). For areas and distances,  
665 the difference between the ancestral and derived regimes disparity is greater than for the ICM morphospace, with Simiiform  
666 showing a higher disparity than Strepsirrhini.

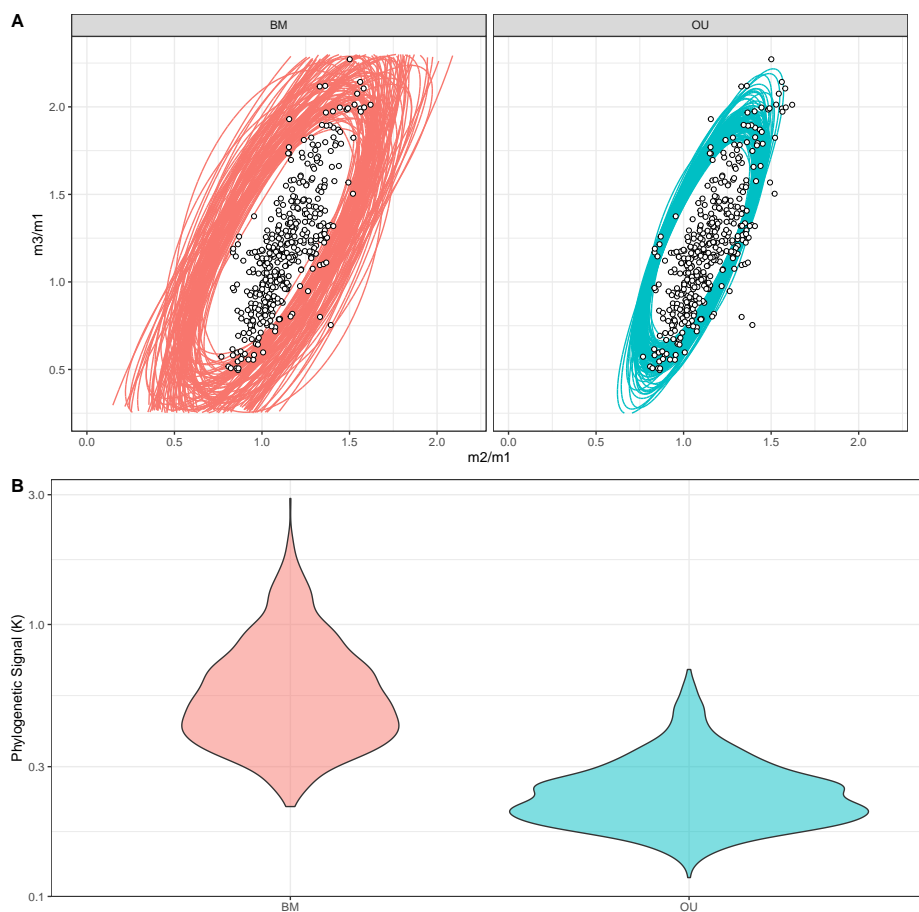

**Figure S7.** Simulated disparity (A) and phylogenetic signal (B) by assuming the best model (OU) or a brownian motion (BM) model with the same rate parameters as the best OU model. Ellipses represent the covariance matrix of the simulated tip values, and thus do not represent any evolutionary parameter (*e.g.*  $\Sigma$ ,  $H$ ,  $\Omega$ ), but the empirical phenotypic distributions. Dots are observed species averages.

## 667 G Supplementary references

### 668 References

- 669 **91.** Roseman, C. C. & Delezenne, L. K. The inhibitory cascade model is not a good predictor of molar size covariation. *Evol.*  
670 *Biol.* **46**, 229–238 (2019).
- 671 **92.** Mitov, V., Bartoszek, K., Asimomitis, G. & Stadler, T. Fast likelihood calculation for multivariate gaussian phylogenetic  
672 models with shifts. *Theor. Popul. Biol.* **131**, 66–78, DOI: [10.1016/j.tpb.2019.11.005](https://doi.org/10.1016/j.tpb.2019.11.005) (2020).
- 673 **93.** Hopkins, M. J. & Gerber, S. Morphological disparity. *Evol. developmental biology: A reference guide* 965–976 (2021).
- 674 **94.** Blomberg, S. P., Garland, T. & Ives, A. R. Testing for phylogenetic signal in comparative data: behavioral traits are more  
675 labile. *Evolution* **57**, 717–745, DOI: [10.1111/j.0014-3820.2003.tb00285.x](https://doi.org/10.1111/j.0014-3820.2003.tb00285.x) (2003).
- 676 **95.** Adams, D. C. A generalized k statistic for estimating phylogenetic signal from shape and other high-dimensional  
677 multivariate data. *Syst. Biol.* **63**, 685–697, DOI: [10.1093/sysbio/syu030](https://doi.org/10.1093/sysbio/syu030) (2014).

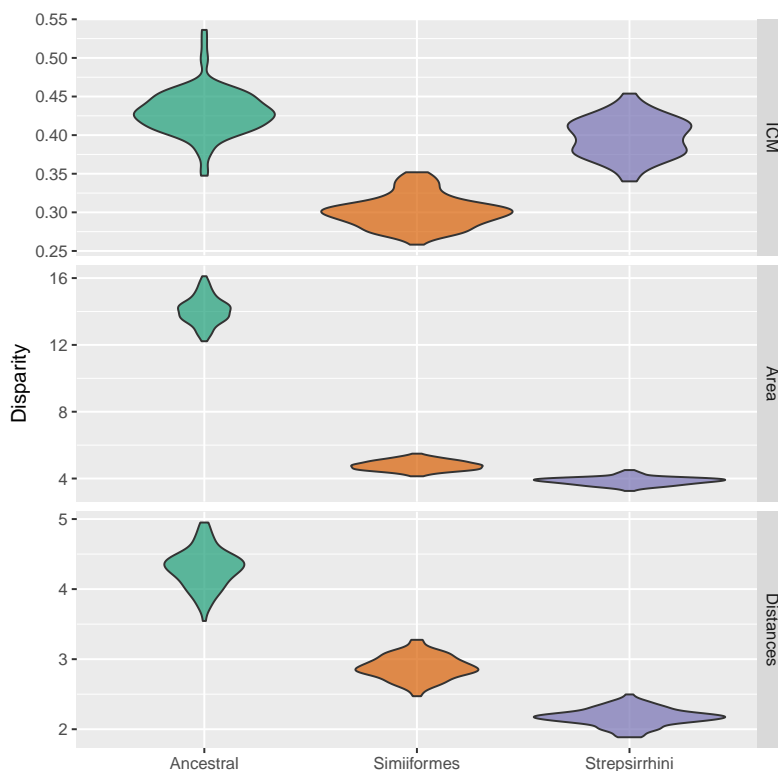

**Figure S8.** Simulated regime-specific disparities for Three-regime model on morphospace.

## 678 H Data source references

### 679 References

- 680 **97.** Abbazzi, L., Fanfani, F., Ferretti, M. P., Rook, L., Cattani, L., Masini, F., Mallegni, F., Negrino, F., Tozzi, C. (2000).  
681 New human remains of archaic *Homo sapiens* and lower palaeolithic industries from Visogliano (Duino Aurisina, Trieste,  
682 Italy). *Journal of Archaeological Science*, 27(12), 1173-1186.
- 683 **98.** Alba, D. M. (2012). Fossil apes from the Vall'es-Pened'es Basin. *Evolutionary Anthropology: Issues, News, and Reviews*,  
684 21(6), 254-269.
- 685 **99.** Alba, D. M., Alm'ecija, S., Casanovas-Vilar, I., M'endez, J. M., Moy'a-Sol'a, S. (2012). A partial skeleton of the fossil  
686 great ape *Hispanopithecus laietanus* from Can Feu and the mosaic evolution of crown-hominoid positional behaviors.  
687 *PLoS One*, 7(6), e39617.
- 688 **100.** Alba, D. M., Casanovas-Vilar, I., Alm'ecija, S., Robles, J. M., Arias-Martorell, J., Moy'a-Sol'a, S. (2012). New dental  
689 remains of *Hispanopithecus laietanus* (Primates: Hominidae) from Can Llobateres 1 and the taxonomy of late Miocene  
690 hominoids from the Vall'es-Pened'es Basin (NE Iberian Peninsula). *Journal of Human Evolution*, 63(1), 231-246.
- 691 **101.** Alba, D. M., Fortuny, J., Perez de Los Rios, M., Zanolli, C., Alm'ecija, S., Casanovas-Vilar, I., Robles, J. M., Moy'a-Sol'a,  
692 S. (2013). New dental remains of *Anoiapithecus* and the first appearance datum of hominoids in the Iberian Peninsula.  
693 *Journal of Human Evolution*, 65(5), 573-584.
- 694 **102.** Alba, D. M., Moy'a-Sol'a, S., Malgosa, A., Casanovas-Vilar, I., Robles, J. M., Alm'ecija, S., Galindo, J., Rotgers, C.,  
695 Mengual, J. V. B. (2010). A new species of *Pliopithecus gervaisi*, 1849 (primates: Pliopithecidae) from the middle Miocene  
696 (mn8) of abocador de can mata (els hostalets de pierola, catalonia, Spain). *American Journal of Physical Anthropology:*  
697 *The Official Publication of the American Association of Physical Anthropologists*, 141(1), 52-75.
- 698 **103.** Alba, D. M., Moy'a-Sol'a, S., Robles, J. M., Galindo, J. (2012). Brief communication: The oldest pliopithecid record in  
699 the iberian peninsula based on new material from the vall'es-pened'es basin. *American Journal of Physical Anthropology*,  
700 147(1), 135-140.
- 701 **104.** Andrews, P. (1970). Two new fossil primates from the lower Miocene of kenya. *Nature*, 228(5271), 537-540.



- 702 **105.** Andrews, P. (1974). New species of dryopithecus from kenya. *Nature*, 249, 188–190.
- 703 **106.** Anthony, M. R., Kay, R. F. (1993). Tooth form and diet in ateline and alouattine primates: reflections on the comparative  
704 method. *American Journal of Science*, 293(A), 356.
- 705 **107.** Asfaw, B., White, T., Lovejoy, O., Latimer, B., Simpson, S., Suwa, G. (1999). Australopithecus garhi: a new species of  
706 early hominid from ethiopia. *Science*, 284(5414), 629–635.
- 707 **108.** Atwater, A. L., Kirk, E. C. (2018). New middle eocene omomyines (primates, haplorhini) from san diego county,  
708 california. *Journal of Human Evolution*, 124, 7–24.
- 709 **109.** Atwater, A. L. et al. *New Middle Eocene Omomyines (Primates, Haplorhini) from the Friars Formation of San Diego*  
710 *County, Southern California*. PhD thesis, 2017.
- 711 **110.** Bacon, A.-M., Demeter, F., Schuster, M., Long, V. T., Thuy, N. K., Antoine, P.-O., Sen, S., Nga, H. H., and Huong,  
712 N. M. The pleistocene ma u'oi cave, northern vietnam: palaeontology, sedimentology and palaeoenvironments. *Geobios*,  
713 37(3):305–314, 2004.
- 714 **111.** Bajpai, S., Kay, R. F., Williams, B. A., Das, D. P., Kapur, V. V., and Tiwari, B. N. The oldest asian record of anthropoidea.  
715 *Proceedings of the National Academy of Sciences*, 105(32):11093–11098, 2008.
- 716 **112.** Barry, J. C., Jacobs, L. L., and Kelley, J. An early middle Miocene catarrhine from pakistan with comments on the  
717 dispersal of catarrhines into eurasia. *Journal of Human Evolution*, 15(6):501–508, 1986.
- 718 **113.** Beard, K. C. New notharctine primate fossils from the early Eocene of New Mexico and southern Wyoming and the  
719 phylogeny of Notharctinae. *American Journal of Physical Anthropology*, 75(4):439–469, 1988.
- 720 **114.** Beard, K. C., Krishtalka, L., Stucky, R. K. (1992). Revision of the Wind River faunas, early Eocene of central Wyoming.  
721 Part 12. New species of omomyid primates (Mammalia: Primates: Omomyidae) and omomyid taxonomic composition  
722 across the early-middle Eocene boundary. *Annals of the Carnegie Museum*, 61(1), 39–62.
- 723 **115.** Beard, K. C., Jones, M. F., Thurber, N. A., Sanisidro, O. (2019). Systematics and paleobiology of chiromyoides  
724 (Mammalia, plesiadapidae) from the upper paleocene of western north america and western europe. *Journal of Vertebrate*  
725 *Paleontology*, 39(6), e1730389.
- 726 **116.** Beard, K. C., Marivaux, L., Chaimanee, Y., Jaeger, J.-J., Marandat, B., Tafforeau, P., Soe, A. N., Tun, S. T., Kyaw, A. A.  
727 (2009). A new primate from the eocene pondaung formation of myanmar and the monophyly of burmese amphipithecids.  
728 *Proceedings of the Royal Society B: Biological Sciences*, 276(1671), 3285–3294.
- 729 **117.** Beard, K. C., M'etais, G., Ocakoğlu, F., Licht, A. (2021). An omomyid primate from the pontide microcontinent of  
730 north-central anatolia: Implications for sweepstakes dispersal of terrestrial mammals during the eocene. *Geobios*, 66,  
731 143–152.
- 732 **118.** Beard, K. C. (2000). A new species of carpocristes (Mammalia: Primatomorpha) from the middle tiffanian of the bison  
733 basin, Wyoming, with notes on carpolestid phylogeny. *Annals of Carnegie Museum*, 69(3), 195–208.
- 734 **119.** Begun, D. R. (1992). Dryopithecus crusafonti sp. nov., a new Miocene hominoid species from can ponsic (northeastern  
735 Spain). *American Journal of Physical Anthropology*, 87(3), 291–309.
- 736 **120.** Berger, L. R., Parkington, J. E. (1995). A new pleistocene hominid-bearing locality at hoedjiespunt, south africa.  
737 *American Journal of Physical Anthropology*, 98(4), 601–609.
- 738 **121.** Bernor, R. L., Flynn, L. J., Harrison, T., Hussain, S. T., Kelley, J. (1988). Dionysopithecus from southern pakistan and  
739 the biochronology and biogeography of early eurasian catarrhines. *Journal of Human Evolution*, 17(3), 339–358.
- 740 **122.** Bloch, J. I., Boyer, D. M., Gingerich, P. D., Gunnell, G. F. (2002). New primitive paromomyid from the clarkforkian of  
741 Wyoming and dental eruption in plesiadapiformes. *Journal of Vertebrate Paleontology*, 22(2), 366–379.
- 742 **123.** Bloch, J. I., Gingerich, P. D. (1998). Carpolestes simpsoni, new species (Mammalia, proprimates) from the late paleocene  
743 of the clark's fork basin, Wyoming.
- 744 **124.** Blumenberg, B., Lloyd, A. T. (1983). Australopithecus and the origin of the genus homo: Aspects of biometry and  
745 systematics with accompanying catalog of tooth metric data. *BioSystems*, 16(2), 127–167.
- 746 **125.** Bown, T. M., Rose, K. D. (1987). Patterns of dental evolution in early eocene anaptomorphine primates (omomyidae)  
747 from the bighorn basin, Wyoming. *Memoir (The Paleontological Society)*, 1–162.
- 748 **126.** Bown, T. M., Rose, K. D. (1991). Evolutionary relationships of a new genus and three new species of omomyid primates  
749 (willwood formation, lower eocene, bighorn basin, Wyoming). *Journal of Human Evolution*, 20(6), 465–480.

- 750 **127.** Boyer, D. M., Costeur, L., Lipman, Y. (2012). Earliest record of platychoerops (primates, plesiadapidae), a new species  
751 from mouras quarry, mont de berru, france. *American Journal of Physical Anthropology*, 149(3), 329–346.
- 752 **128.** Boyer, D. M., Maiolino, S. A., Holroyd, P. A., Morse, P. E., Bloch, J. I. (2018). Oldest evidence for grooming claws in  
753 euprimates. *Journal of Human Evolution*, 122, 1–22.
- 754 **129.** Boyer, D. M., Scott, C. S., Fox, R. C. (2012). New craniodental material of pronothodectes gaoi fox (Mam-  
755 malia, “plesiadapiformes”) and relationships among members of plesiadapidae. *American Journal of Physical Anthropol-*  
756 *ogy*, 147(4), 511–550.
- 757 **130.** Boyer, D. M., Seiffert, E. R., Gladman, J. T., Bloch, J. I. (2013). Evolution and allometry of calcaneal elongation in living  
758 and extinct primates. *PloS one*, 8(7), e67792.
- 759 **131.** Boyer, D. M., Seiffert, E. R., Simons, E. L. (2010). Astragalar morphology of afradapis, a large adapiform primate from  
760 the earliest late eocene of egypt. *American Journal of Physical Anthropology*, 143(3), 383–402.
- 761 **132.** Brace, C. L. (1979). Krapina, “classic” neanderthals, and the evolution of the european face. *Journal of Human Evolution*,  
762 8(5), 527–550.
- 763 **133.** Bown, T. M., Rose, K. D. (1976). New early Tertiary primates and a reappraisal of some Plesiadapiformes. *Folia*  
764 *Primatologica*, 26(2), 109–138.
- 765 **134.** Bown, T. M., Rose, K. D. (1984). Reassessment of some early Eocene Omomyidae, with description of a new genus and  
766 three new species. *Folia Primatologica*, 43(2-3), 97–112.
- 767 **135.** Brunet, M., Guy, F., Pilbeam, D., Lieberman, D. E., Likius, A., Mackaye, H. T., ... Vignaud, P. (2005). New material of  
768 the earliest hominid from the upper Miocene of Chad. *Nature*, 434(7034), 752–755.
- 769 **136.** Brunet, M., Guy, F., Pilbeam, D., Mackaye, H. T., Likius, A., Ahounta, D., ... Vignaud, P. (2002). A new hominid from  
770 the upper Miocene of Chad, Central Africa. *Nature*, 418(6894), 145–151.
- 771 **137.** Buckley, G. A. (1997). A new species of Purgatorius (Mammalia; Primatomorpha) from the lower Paleocene Bear  
772 Formation, Crazy Mountains Basin, south-central Montana. *Journal of Paleontology*, 71(1), 149–155.
- 773 **138.** Burger, B. J., Honey, J. G. (2008). Plesiadapidae (Mammalia, Primates) from the late Paleocene Fort Union Formation of  
774 the Piceance Creek Basin, Colorado. *Journal of Vertebrate Paleontology*, 28(3), 816–825.
- 775 **139.** Burger, B. J. (2010). Skull of the Eocene primate Omomys carteri from western North America. *Paleontological*  
776 *Contributions*, 2010(2), 1–19.
- 777 **140.** Chaimanee, Y. (2004). Siamopithecus eocaenus, anthropoid primate from the late Eocene of Krabi, Thailand. In *Anthropoid*  
778 *origins: new visions* (pp. 341–368).
- 779 **141.** Chaimanee, Y., Chavasseau, O., Beard, K. C., Kyaw, A. A., Soe, A. N., Sein, C., Lazzari, V., Marivaux, L., Marandat,  
780 B., Swe, M., et al. (2012). Late middle eocene primate from myanmar and the initial anthropoid colonization of africa.  
781 *Proceedings of the National Academy of Sciences*, 109(26), 10293–10297.
- 782 **142.** Chaimanee, Y., Lazzari, V., Benammi, M., Euriant, A., Jaeger, J.-J. (2015). A new small pliopithecoid primate from the  
783 middle Miocene of thailand. *Journal of Human Evolution*, 88, 15–24.
- 784 **143.** Chaimanee, Y., Lebrun, R., Yamee, C., Jaeger, J.-J. (2011). A new middle Miocene tarsier from thailand and the  
785 reconstruction of its orbital morphology using a geometric–morphometric method. *Proceedings of the Royal Society B:*  
786 *Biological Sciences*, 278(1714), 1956–1963.
- 787 **144.** Chester, S. G., Bloch, J. I. (2013). Systematics of paleogene micromomyidae (Euarchonta, primates) from north america.  
788 *Journal of Human Evolution*, 65(2), 109–142.
- 789 **145.** Ciochon, R. (2012). *New interpretations of ape and human ancestry*. Springer Science Business Media.
- 790 **146.** Clemens, W. A. (1974). Purgatorius, an early paromomyid primate (Mammalia). *Science*, 184(4139), 903–905.
- 791 **147.** Clemens, W. A., Wilson, G. P., Albright, L. B. (2009). Early torrejonian Mammalian local faunas from northeastern  
792 montana, usa. *Museum of Northern Arizona Bulletin*, 65, 111–158.
- 793 **148.** Cooke, S. B., Rosenberger, A. L., Turvey, S. (2011). An extinct monkey from haiti and the origins of the greater antillean  
794 primates. *Proceedings of the National Academy of Sciences*, 108(7), 2699–2704.
- 795 **149.** Cote, S., Malit, N., Nengo, I. (2014). Additional mandibles of Rangwapithecus gordonii, an early Miocene catarrhine  
796 from the Tinderet localities of western Kenya. *American Journal of Physical Anthropology*, 153(3), 341–352.

- 797 **150.** Cuzzo, F. P., Rasoazanabary, E., Godfrey, L. R., Sauther, M. L., Youssouf, I. A., LaFleur, M. M. (2013). Biological  
798 variation in a large sample of mouse lemurs from Amboasary, Madagascar: Implications for interpreting variation in  
799 primate biology and paleobiology. *Journal of Human Evolution*, 64(1), 1–20.
- 800 **151.** Cuzzo, F. P. (2000). Craniodental variation in dwarf galagos (Galagoides) and mouse lemurs (Microcebus) and its  
801 implications for the paleotaxonomy of small-bodied Eocene primates. PhD thesis, University of Colorado at Boulder.
- 802 **152.** De Bast, E., Gagnaison, C., Smith, T. (2018). Plesiadapid mammals from the latest Paleocene of France offer new  
803 insights on the evolution of Plesiadapis during the Paleocene-Eocene transition. *Journal of Vertebrate Paleontology*, 38(3),  
804 e1460602.
- 805 **153.** De Bonis, L., Koufos, G. D. (1993). The face and the mandible of Ouranopithecus macedoniensis: Description of new  
806 specimens and comparisons. *Journal of Human Evolution*, 24(6), 469–491.
- 807 **154.** De Bonis, L., Koufos, G. D., Guy, F., Peigné, S., and Sylvestrou, I. Nouveaux restes du primate hominoïde Ouranopithecus  
808 dans les dépôts du Miocène supérieur de Macédoine (Grèce). *Comptes Rendus de l'Académie des Sciences-Series IIA-*  
809 *Earth and Planetary Science*, 327(2):141–146, 1998.
- 810 **155.** Davidson, J. R. (1987). *Geology and Mammalian paleontology of the Wind River Formation, Laramie Basin, southeastern*  
811 *Wyoming*. University of Wyoming.
- 812 **156.** Dutchak, A. R. (2010). *Mammalian faunal change during the early Eocene climatic optimum (Wasatchian and Bridgerian)*  
813 *at Raven Ridge in the Northeastern Uinta Basin, Colorado and Utah*. University of Colorado at Boulder.
- 814 **157.** Engelberger, S. (2010). *Annotated catalogue of primate type specimens in the mammal collection of the Museum of*  
815 *Natural History Vienna*. PhD thesis, University of Vienna.
- 816 **158.** Femenias-Gual, J., Marigó, J., Minwer-Barakat, R., and Moyà-Solà, S. New dental and postcranial material of Agerinia  
817 smithorum (primates, adapiformes) from the type locality Casa Retjo-1 (early Eocene, Iberian Peninsula). *Journal of*  
818 *Human Evolution*, 113:127–136, 2017.
- 819 **159.** Femenias-Gual, J., Minwer-Barakat, R., Marigó, J., Moyà-Solà, S. (2016). Agerinia smithorum sp. nov., a new early  
820 Eocene primate from the Iberian Peninsula. *American Journal of Physical Anthropology*, 161(1), 116–124.
- 821 **160.** Fleagle, J. G., Powers, D. W., Conroy, G. C., Watters, J. P. (1987). New fossil platyrrhines from Santa Cruz Province,  
822 Argentina. *Folia primatologica*, 48(1-2), 65–77.
- 823 **161.** Fleagle, J. G., Simons, E. L. (1978). Micropithecus clarki, a small ape from the Miocene of Uganda. *American Journal of*  
824 *Physical Anthropology*, 49(4), 427–440.
- 825 **162.** Flynn, J. J., Wyss, A. R., Charrier, R., Swisher, C. C. (1995). An early Miocene anthropoid skull from the Chilean Andes.  
826 *Nature*, 373(6515), 603–607.
- 827 **163.** Fox, R. C. (1990). Pronothodectes gaoi n. sp. from the late Paleocene of Alberta, Canada, and the early evolution of the  
828 Plesiadapidae (Mammalia, Primates). *Journal of Paleontology*, 64(4), 637–647.
- 829 **164.** Fox, R. C. (1991). Saxonella (Plesiadapiformes? Primates) in North America: S. naylori, sp. nov., from the late Paleocene  
830 of Alberta, Canada. *Journal of Vertebrate Paleontology*, 11(3), 334–349.
- 831 **165.** Fox, R. C. (2002). The dentition and relationships of carpodactes cygneus (russell)(carpoledidae, plesiadapiformes,  
832 Mammalia), from the late paleocene of alberta, canada. *Journal of Paleontology*, 76(5):864–881.
- 833 **166.** Franzen, J. L., Gingerich, P. D., Habersetzer, J., Hurum, J. H., Von Koenigswald, W., Smith, B. H. (2009). Complete  
834 primate skeleton from the middle Eocene of Messel in Germany: morphology and paleobiology. *PLoS one*, 4(5), e5723.
- 835 **167.** Gabunia, L., Vekua, A. (1995). A plio-pleistocene hominid from Dmanisi, East Georgia, Caucasus. *Nature*, 373(6514),  
836 509–512.
- 837 **168.** Gazin, C. L. (1956). Paleocene Mammalian faunas of the Bison Basin in south-central Wyoming. *Smithsonian Miscella-*  
838 *neous Collections*.
- 839 **169.** Gazin, C. L. (1958). A review of the middle and upper Eocene primates of North America. *Smithsonian Miscellaneous*  
840 *Collections*.
- 841 **170.** Gazin, C. L. (1968). A new primate from the Torrejon middle Paleocene of the San Juan Basin, New Mexico. *Proceedings*  
842 *of the Biological Society of Washington*, 81, 629–634.
- 843 **171.** Gazin, C. L. (1971). Paleocene primates from the Shotgun Member of the Fort Union Formation in the Wind River Basin,  
844 Wyoming. *Proceedings of the Biological Society of Washington*, 84(3), 13-38.

- 845 **172.** Gençtürk, I., Alpagut, B., Andrews, P. (2008). Interproximal wear facets and tooth associations in the paşalar hominoid  
846 sample. *Journal of human evolution*, 54(4), 480–493.
- 847 **173.** Gilbert, C. C., Goble, E. D., Hill, A. (2010). Miocene cercopithecoidea from the Tugen Hills, Kenya. *Journal of Human*  
848 *Evolution*, 59(5), 465–483.
- 849 **174.** Gilbert, C. C., Patel, B. A., Singh, N. P., Campisano, C. J., Fleagle, J. G., Rust, K. L., Patnaik, R. (2017). New sivaladapid  
850 primate from lower Siwalik deposits surrounding Ramnagar (Jammu and Kashmir State), India. *Journal of human*  
851 *evolution*, 102, 21–41.
- 852 **175.** Gingerich, P. D. (1974). Cranial anatomy and evolution of early Tertiary Plesiadapidae (Mammalia, Primates) (Doctoral  
853 dissertation, Yale University).
- 854 **176.** Gingerich, P. D. (1977). Dental variation in early eocene teilhardina belgica, with notes on the anterior dentition of some  
855 early tarsiiformes. *Folia Primatologica*, 28(2):144–153.
- 856 **177.** Gingerich, P. D. (1977). New species of eocene primates and the phylogeny of european adapidae. *Folia Primatologica*,  
857 28(1):60–80.
- 858 **178.** Gingerich, P. D., Simons, E. L. (1977). Systematics, phylogeny, and evolution of early Eocene Adapidae (Mammalia,  
859 Primates) in North America.
- 860 **179.** Gingerich, P. D. (1978). The stuttgart collection of oligocene primates from the fayum province of egypt. *Paläontologische*  
861 *Zeitschrift*, 52:82–92.
- 862 **180.** Gingerich, P. D. (1979). Phylogeny of middle Eocene Adapidae (Mammalia, Primates) in North America: Smilodectes  
863 and Notharctus. *Journal of Paleontology*, 153-163.
- 864 **181.** Gingerich, P. D., Haskin, R. A. (1981). Dentition of early eocene pelycodus jarrovi (Mammalia, primates) and the  
865 generic attribution of species formerly referred to pelycodus.
- 866 **182.** Gingerich, P. D., Smith, B. H., and Rosenberg, K. (1982). Allometric scaling in the dentition of primates and prediction  
867 of body weight from tooth size in fossils. *American Journal of Physical Anthropology*, 58(1), 81-100.
- 868 **183.** Gingerich, P. D., Dashzeveg, D., and Russell, D. E. (1991). Dentition and systematic relationships of altanius orlovi  
869 (Mammalia, primates) from the early eocene of mongolia. *Geobios*, 24(5), 637-646.
- 870 **184.** Gingerich, P. D. (1995). Sexual dimorphism in Earliest Eocene Cantis Torresi (Mammalia, Primates, Adapoidea). (type of  
871 Gingerich 1986a)
- 872 **185.** Godinot, M. (1998). A summary of adapiform systematics and phylogeny. *Folia primatologica*, 69(7), 218-249.
- 873 **186.** Godinot, M., Russell, D. E., and Louis, P. (1992). Oldest known nannopithec (primates, omomyiformes) from the early  
874 eocene of france. *Folia Primatologica*, 58(1), 32-40.
- 875 **187.** Gracia-T'ellez, A., Arsuaga, J.-L., Martínez, I., Martínez-Francés, L., Martín-on-Torres, M., Bermúdez de Castro, J.-M.,  
876 Bonmatí, A., and Lira, J. (2013). Orofacial pathology in homo heidelbergensis: The case of skull 5 from the sima de los  
877 huesos site (atapuerca, Spain). *Quaternary international*, 295, 83-93.
- 878 **188.** Granger, W., Gregory, W. K. (1917). A revision of the Eocene primates of the genus Notharctus. *Bulletin of the AMNH*; v.  
879 37, article 34.
- 880 **189.** Gregory, W. K., Hellman, M., Lewis, G. E. (1938). Fossil anthropoids of the Yale-Cambridge India expedition of 1935.  
881 *Carnegie institution of Washington*.
- 882 **190.** Gunnell, G. F. (1989). Evolutionary history of Microsyopoidea (Mammalia, ? Primates) and the relationship between  
883 Plesiadapiformes and Primates.
- 884 **191.** Gunnell, G. F., Gingerich, P. D. (1981). A new species of niptomomys (microsyopidae) from the early eocene of  
885 Wyoming. *Folia Primatologica*, 36(1-2), 128-137.
- 886 **192.** Gunnell, G. F., Bartels, W. S., Gingerich, P. D., Torres, V. (1992). Wapiti Valley faunas: early and middle Eocene fossil  
887 vertebrates from the North Fork of the Shoshone River, Park County, Wyoming.
- 888 **193.** Gunnell, G. F., Bartels, W. S., Gingerich, P. D., Torres, V. (1992). Wapiti Valley faunas: early and middle Eocene fossil  
889 vertebrates from the North Fork of the Shoshone River, Park County, Wyoming.
- 890 **194.** Gunnell, G. F. (1995). Omomyid primates (tarsiiformes) from the bridger formation, middle eocene, southern green river  
891 basin, Wyoming. *Journal of Human Evolution*, 28(2), 147-187.



- 892 **195.** Gunnell, G. F. (1995). New notharctine (primates, adapiformes) skull from the Uintan (middle Eocene) of San Diego  
893 County, California. *American Journal of Physical Anthropology*, 98(4), 447-470.
- 894 **196.** Gunnell, G. F., Miller, E. R. (2001). Origin of anthropoidea: dental evidence and recognition of early anthropoids in the  
895 fossil record, with comments on the asian anthropoid radiation. *American Journal of Physical Anthropology: The Official  
896 Publication of the American Association of Physical Anthropologists*, 114(3), 177-191.
- 897 **197.** Gunnell, G. F. (2002). Notharctine primates (Adapiformes) from the early to middle Eocene (Wasatchian–Bridgerian)  
898 of Wyoming: transitional species and the origins of Notharctus and Smilodectes. *Journal of Human Evolution*, 43(3),  
899 353-380.
- 900 **198.** Haile-Selassie, Y., Gibert, L., Melillo, S. M., Ryan, T. M., Alene, M., Deino, A., Levin, N. E., Scott, G., Saylor, B. Z.  
901 (2015). New species from Ethiopia further expands middle Pliocene hominin diversity. *Nature*, 521(7553), 483–488.
- 902 **199.** Harrison, T. (1981). New finds of small fossil apes from the Miocene locality at Koru in Kenya. *Journal of Human  
903 Evolution*, 10(2), 129–137.
- 904 **200.** Harrison, T. (1986). New fossil anthropoids from the middle Miocene of East Africa and their bearing on the origin of the  
905 Oreopithecidae. *American Journal of Physical Anthropology*, 71(3), 265–284.
- 906 **201.** Harrison, T. (1988). A taxonomic revision of the small catarrhine primates from the early Miocene of East Africa. *Folia  
907 Primatologica*, 50(1-2), 59–108.
- 908 **202.** Harrison, T. (1989). A new species of *Micropithecus* from the middle Miocene of Kenya. *Journal of Human Evolution*,  
909 18(6), 537–557.
- 910 **203.** Harrison, T. (1992). A reassessment of the taxonomic and phylogenetic affinities of the fossil catarrhines from Fort Ternan,  
911 Kenya. *Primates*, 33, 501–522.
- 912 **204.** Harrison, T., Gu, Y. (1999). Taxonomy and phylogenetic relationships of early Miocene catarrhines from Sihong, China.  
913 *Journal of Human Evolution*, 37(2), 225–277.
- 914 **205.** Harrison, T., Van der Made, J., Ribot, F. (2002). A new middle Miocene pliopithecoid from Sant Quirze, northern Spain.  
915 *Journal of Human Evolution*, 42(4), 371–377.
- 916 **206.** Harrison, T. (2010). Dendropithecoidea, Proconsuloidea, and Hominoidea. In W. Henke, I. Tattersall, et al. (Eds.),  
917 *Handbook of Paleoanthropology* (Vol. III, pp. 429–469). Springer-Verlag.
- 918 **207.** Henke, W., Tattersall, I., et al. (2015). *Handbook of Paleoanthropology* (Vol. III). Springer-Verlag.
- 919 **208.** Hill, A., Behrensmeyer, K., Brown, B., Deino, A., Rose, M., Saunders, J., Ward, S., Winkler, A. (1991). Kipsaramon: a  
920 lower Miocene hominoid site in the tugen hills, baringo district, kenya. *Journal of Human Evolution*, 20(1), 67–75.
- 921 **209.** Hill, A., Nengo, I. O., Rossie, J. B. (2013). A rangwapithecus gordonii mandible from the early Miocene site of songhor,  
922 kenya. *Journal of Human Evolution*, 65(5), 490–500.
- 923 **210.** Hlusko, L. J. (2007). A new late Miocene species of paracolobus and other cercopithecoidea (Mammalia: Primates)  
924 fossils from lemudong'o, kenya. *Kirtlandia*, 56(72), e85.
- 925 **211.** Hlusko, L. J., Carlson, J. P., Guatelli-Steinberg, D., Krueger, K. L., Mersey, B., Ungar, P. S., Defleur, A. (2013).  
926 Neanderthal teeth from moula-guercy, ard'eche, france. *American Journal of Physical Anthropology*, 151(3), 477–491.
- 927 **212.** Hooker, J. J., Harrison, D. L. (2008). A new clade of omomyid primates from the european paleogene. *Journal of  
928 Vertebrate Paleontology*, 28(3), 826–840.
- 929 **213.** Hooker, J. J. (2007). A new microchoerine omomyid (primates, Mammalia) from the english early eocene and its  
930 palaeobiogeographical implications. *Palaeontology*, 50(3), 739–756.
- 931 **214.** Hooker, J. J., Russell, D. E., Ph'elizon, A. (1999). A new family of plesiadapiformes (Mammalia) from the old world  
932 lower paleogene. *Palaeontology*, 42(3), 377–407.
- 933 **215.** Horovitz, I., MacPhee, R. D. E. (1999). The quaternary cuban platyrrhineparalouatta varoniai and the origin of antillean  
934 monkeys. *Journal of Human Evolution*, 36(1), 33–68.
- 935 **216.** Hublin, J.-J., Ben-Ncer, A., Bailey, S. E., Freidline, S. E., Neubauer, S., Skinner, M. M., Bergmann, I., Le Cabec, A.,  
936 Benazzi, S., Harvati, K., et al. (2017). New fossils from Jebel Irhoud, Morocco and the pan-African origin of *Homo  
937 sapiens*. *Nature*, 546(7657), 289–292.
- 938 **217.** Imbrasas, M. (2018). Performance of 2D geometric morphometric analysis in hominin taxonomy and its application to  
939 the mandibular molar sample from Lomekwi, Kenya (Doctoral dissertation, University of Kent (United Kingdom)).

- 940 **218.** Jacobs, L. L. (1981). Miocene lorid primates from the Pakistan Siwaliks. *Nature*, 289(5798), 585–587.
- 941 **219.** Jaeger, J.-J., Thein, T., Benammi, M., Chaimanee, Y., Soe, A. N., Lwin, T., Tun, T., Wai, S., Ducrocq, S. (1999). A new  
942 primate from the middle Eocene of Myanmar and the Asian early origin of anthropoids. *Science*, 286(5439), 528–530.
- 943 **220.** Jaeger, J.-J., Beard, K. C., Chaimanee, Y., Salem, M., Benammi, M., Hlal, O., Coster, P., Bilal, A. A., Dusinger, P.,  
944 Schuster, M., et al. (2010). Late middle Eocene epoch of Libya yields earliest known radiation of African anthropoids.  
945 *Nature*, 467(7319), 1095–1098.
- 946 **221.** Jaeger, J.-J., Chavasseau, O., Lazzari, V., Soe, A. N., Sein, C., Le Maître, A., Shwe, H., Chaimanee, Y. (2019). New  
947 Eocene primate from Myanmar shares dental characters with African Eocene crown anthropoids. *Nature Communications*,  
948 10(1), 3531.
- 949 **222.** Kay, R. F. (1997). A new small platyrrhine and the phyletic position of Callitrichinae. In *Vertebrate Paleontology in the*  
950 *Neotropics: the Miocene fauna of La Venta, Colombia* (pp. 435–458).
- 951 **223.** Kay, R. F. (1982). *Sivapithecus simonsi*, a new species of Miocene hominoid, with comments on the phylogenetic status  
952 of the Ramapithecinae. *International Journal of Primatology*, 3, 113–173.
- 953 **224.** Kay, R. F. (1993). Large fossil platyrrhines from the Rio Acre local fauna, late Miocene, western Amazonia. *J. Hum.*  
954 *Evol.*, 25, 319–327.
- 955 **225.** Gazin, C. L. (1971). Paleocene primates from the Shotgun Member of the Fort Union Formation in the Wind River Basin,  
956 Wyoming. *Proceedings of the Biological Society of Washington*, 84(3), 13-38.
- 957 **226.** Kay, R. F. (1994). “Giant” tamarin from the Miocene of Colombia. *American Journal of Physical Anthropology*, 95(3),  
958 333-353.
- 959 **227.** Kay, R. F. (2010). A new primate from the early Miocene of Gran Barranca, Chubut Province, Argentina: Paleocological  
960 implications. *The Paleontology of Gran Barranca: Evolution and Environmental Change through the Middle Cenozoic of*  
961 *Patagonia*. Cambridge University Press, Cambridge, 220-239.
- 962 **228.** Kay, R. F., Cozzuol, M. A. (2006). New platyrrhine monkeys from the Solimoes Formation (late Miocene, Acre State,  
963 Brazil). *Journal of Human Evolution*, 50(6), 673-686.
- 964 **229.** Kay, R. F., Fleagle, J. G., Mitchell, T. R., Colbert, M., Bown, T., Powers, D. W. (2008). The anatomy of *Dolichocebus*  
965 *gaimanensis*, a stem platyrrhine monkey from Argentina. *Journal of Human Evolution*, 54(3), 323-382.
- 966 **230.** Kay, R. F., Fleagle, J. G., Simons, E. L. (1981). A revision of the Oligocene apes of the Fayum Province, Egypt. *American*  
967 *Journal of Physical Anthropology*, 55(3), 293-322.
- 968 **231.** Kay, R. F., Gonzales, L. A., Salenbien, W., Martinez, J. N., Cooke, S. B., Valdivia, L. A., Rigsby, C., Baker, P. A. (2019).  
969 *Parvimico materdei* gen. et sp. nov.: A new platyrrhine from the early Miocene of the Amazon Basin, Peru. *Journal of*  
970 *human evolution*, 134, 102628.
- 971 **232.** Kay, R. F., Madden, R. H., D’íaz, J. G. (1988). Nuevos hallazgos de monos en el Mioceno de Colombia. *Ameghiniana*,  
972 25(3), 203-212.
- 973 **233.** Kay, R. F., Madden, R. H., Plavcan, J. M., Cifelli, R. L., D’íaz, J. G. (1987). *Stirtonia victoriae*, a new species of Miocene  
974 Colombian primate. *Journal of Human Evolution*, 16(2), 173-196.
- 975 **234.** Kay, R. F., Perry, J. M. G., Malinzak, M. D., Allen, K. L., Kirk, E. C., Plavcan, J. M., Fleagle, J. G. (2012). The  
976 paleobiology of santacrucian primates. *Early Miocene Paleobiology in Patagonia: High-Latitude Paleocommunities of*  
977 *the Santa Cruz Formation*, 306–330.
- 978 **235.** Kay, R. F., Simons, E. L. (1980). The ecology of oligocene african anthropoidea. *International Journal of Primatology*, 1,  
979 21–37.
- 980 **236.** Kay, R. F., Ungar, P. S. (1997). Dental evidence for diet in some Miocene catarrhines with comments on the effects  
981 of phylogeny on the interpretation of adaptation. *Function, phylogeny, and fossils: Miocene hominoid evolution and*  
982 *adaptations*, 131–151.
- 983 **237.** Kay, R. F., Williams, B. A. (1994). Dental evidence for anthropoid origins. *Anthropoid origins*, 361–445.
- 984 **238.** Kay, R. F., Perry, J. M. G. (2019). New primates from the río santa cruz and río bote (early-middle Miocene), santa cruz  
985 province, argentina. *Publicación Electrónica de la Asociación Paleontológica Argentina*, 19(2), 230–238.
- 986 **239.** Kelley, J. (1988). A new large species of *sivapithecus* from the siwaliks of pakistan. *Journal of Human Evolution*, 17(3),  
987 305–324.



- 988 **240.** Kelley, J., Ward, S., Brown, B., Hill, A., Duren, D. L. (2002). Dental remains of *Equatorius africanus* from Kipsaramon,  
989 tugen hills, baringo district, Kenya. *Journal of human evolution*, 42(1-2), 39–62.
- 990 **241.** Kelly, T. S., Murphey, P. C. (2016). Mammals from the earliest Uintan (middle Eocene) Turtle Bluff member, Bridger  
991 formation, Southwestern Wyoming, USA, part 1: Primates and rodentia. *Palaeontologia Electronica*, 19, 1-55.
- 992 **242.** Kihm, A. J. (1984). Early Eocene Mammalian faunas of the Piceance Creek Basin Northwestern Colorado. University of  
993 Colorado at Boulder.
- 994 **243.** Kirk, E. C., Simons, E. L. (2001). Diets of fossil primates from the Fayum depression of Egypt: a quantitative analysis of  
995 molar shearing. *Journal of Human Evolution*, 40(3), 203-229.
- 996 **244.** Kirk, E. C., Williams, B. A. (2011). New adapiform primate of Old World affinities from the Devil's Graveyard formation  
997 of Texas. *Journal of Human Evolution*, 61(2), 156-168.
- 998 **245.** Kordos, L., Begun, D. R. (1997). A new reconstruction of *Rud 77*, a partial cranium of *Dryopithecus brancoi* from  
999 Rudabánya, Hungary. *American Journal of Physical Anthropology: The Official Publication of the American Association  
1000 of Physical Anthropologists*, 103(2), 277-294.
- 1001 **246.** Koufos, G. D. (1993). Mandible of *Ouranopithecus macedoniensis* (Hominidae, Primates) from a new late Miocene locality  
1002 of Macedonia (Greece). *American Journal of Physical Anthropology*, 91(2), 225-234.
- 1003 **247.** Koufos, G. D. (1995). The first female maxilla of the hominoid *Ouranopithecus macedoniensis* from the late Miocene of  
1004 Macedonia, Greece. *Journal of Human Evolution*, 29(4), 385-399.
- 1005 **248.** Krause, D. W. (1978). Paleocene primates from western Canada. *Canadian Journal of Earth Sciences*, 15(8), 1250-1271.
- 1006 **249.** Krause, D. W., Gingerich, P. D. (1983). Mammalian fauna from Douglass Quarry, earliest Tiffanian (late Paleocene) of the  
1007 eastern Crazy Mountain Basin, Montana.
- 1008 **250.** Krishtalka, L. (1978). Paleontology and geology of the Badwater Creek Area, Central Wyoming. XX: review of the Late  
1009 Eocene Primates from Wyoming and Utah, and the Plataniformes.
- 1010 **251.** Kelly, T.S. (2016). Mammals from the Eocene Colton Formation of the Wind River Basin, Wyoming, USA. *Palaeontologia  
1011 Electronica*, 19.3.41A.
- 1012 **252.** Kunimatsu, Y. (1992). A revision of the hypodigm of *Nyanzapithecus vancouveri*. *African Study Monographs*, 13(4),  
1013 231-235.
- 1014 **253.** Kunimatsu, Y., Ratanasthien, B., Nakaya, H., Saegusa, H., Nagaoka, S. (2004). Earliest Miocene hominoid from  
1015 Southeast Asia. *American Journal of Physical Anthropology: The Official Publication of the American Association of  
1016 Physical Anthropologists*, 124(2), 99-108.
- 1017 **254.** Kunimatsu, Y., Ratanasthien, B., Nakaya, H., Saegusa, H., Nagaoka, S., Suganuma, Y., Fukuchi, A., Udomkan, B. (2005).  
1018 An additional specimen of a large-bodied Miocene hominoid from Chiang Muan, northern Thailand. *Primates*, 46, 65-70.
- 1019 **255.** Lannoye, E.K. (2015). A new middle Paleocene Mammalian fauna from the Fort Union Formation, Great Divide Basin,  
1020 Wyoming. PhD thesis, University of Colorado at Boulder.
- 1021 **256.** Leakey, L.S.B. (1968). Lower dentition of *Kenyapithecus africanus*. *Nature*, 217(5131), 827-830.
- 1022 **257.** Leakey, M.G., Spoor, F., Brown, F.H., Gathogo, P.N., Kiarie, C., Leakey, L.N., McDougall, I. (2016). New Hominin  
1023 Genus from Eastern Africa Shows Diverse Middle Pliocene Lineages. In *Human Evolution Source Book* (pp. 118-127).  
1024 Routledge.
- 1025 **258.** Leakey, M.G., Ungar, P.S., Walker, A. (1995). A new genus of large primate from the late Oligocene of Lothidok, Turkana  
1026 District, Kenya. *Journal of Human Evolution*, 28(6), 519-531.
- 1027 **259.** Leakey, R.E., Leakey, M.G., Walker, A.C. (1988). Morphology of *Turkanapithecus kalakolensis* from Kenya. *American  
1028 Journal of Physical Anthropology*, 76(3), 277-288.
- 1029 **260.** Lillegraven, J.A. (1980). Primates from later Eocene rocks of southern California. *Journal of Mammalogy*, 61(2), 181-204.
- 1030 **261.** Liu, W. and Zheng, L. (2005). Comparisons of tooth size and morphology between the late Miocene hominoids from  
1031 Lufeng and Yuanmou, China, and their implications. *Anthropological Science*, 113(1):73–77.
- 1032 **262.** Lofgren, D. L., Honey, J. G., McKenna, M. C., Zondervan, R. L., Smith, E. E., Wang, X., and Barnes, L. G. (2008).  
1033 Paleocene primates from the Goler formation of the Mojave Desert in California. *Geology and Vertebrate Paleontology of  
1034 Western and Southern North America, Contributions in Honor of David P. Whistler: National History Museum of Los  
1035 Angeles County Science Series*, 41:11–28.

- 1036 **263.** L'opez-Torres, S. (2017). *The Paromomyidae (Primates, Mammalia): Systematics, Evolution, and Ecology*. PhD thesis,  
1037 University of Toronto (Canada).
- 1038 **264.** L'opez-Torres, S. and Silcox, M. T. (2018). The european paromomyidae (primates, Mammalia): taxonomy, phylogeny,  
1039 and biogeographic implications. *Journal of Paleontology*, 92(5):920–937.
- 1040 **265.** L'opez-Torres, S., Silcox, M. T., and Holroyd, P. A. (2018). New omomyoids (euprimates, Mammalia) from the late  
1041 Uintan of southern California, USA, and the question of the extinction of the paromomyidae (plesiadapiformes, primates).  
1042 *Palaeontologia Electronica*, 21(3):1–28.
- 1043 **266.** MacDonald, T. E. (1996). Late paleocene (tiffanian) mammal-bearing localities in superposition, from near Drumheller,  
1044 Alberta.
- 1045 **267.** MacInnes, D. G. (1943). Notes on the east African Miocene primates. *Journal of the East Africa and Uganda Natural  
1046 History Society*, 17(3-4):141–181.
- 1047 **268.** MacPhee, R. D. E. and Horovitz, I. (2004). New craniodental remains of the quaternary Jamaican monkey *Xenothrix  
1048 mcgregori* (Xenotrichini, Callicebinae, Pitheciidae), with a reconsideration of the Aotus hypothesis I. *American Museum  
1049 Novitates*, 2004(3434):1–51.
- 1050 **269.** Madden, C. T. and Lewis, G. E. (1980). *Indopithecus giganteus* distinct from *Sivapithecus indicus*. *Primates*, 21:572–576.
- 1051 **270.** Malassé, A. D., Zhang, P., Wils, P. (2018). A new molar from the middle Pleistocene hominid assemblage of Yanhuidong,  
1052 Tongzi, South China. *Acta Anthropologica Sinica*, 37, 1-17.
- 1053 **271.** Marigó, J., Minwer-Barakat, R., Moyà-Solà, S. (2013). *Nievesia sossisensis*, a new anchomomyin (Adapiformes,  
1054 Primates) from the early late Eocene of the southern Pyrenees (Catalonia, Spain). *Journal of Human Evolution*, 64(6),  
1055 473–485.
- 1056 **272.** Marigó, J., Susanna, I., Minwer-Barakat, R., Madurell-Malapeira, J., Moyà-Solà, S., Casanovas-Vilar, I., Robles, J. M.,  
1057 Alba, D. M. (2014). The primate fossil record in the Iberian Peninsula. *Journal of Iberian Geology*, 40(1), 179–211.
- 1058 **273.** Marivaux, L., Adnet, S., Altamirano-Sierra, A. J., Boivin, M., Pujos, F., Ramdarshan, A., Salas-Gismondi, R., Tejada-Lara,  
1059 J. V., and Antoine, P.-O. (2016). Neotropics provide insights into the emergence of New World monkeys: New dental  
1060 evidence from the late Oligocene of Peruvian Amazonia. *Journal of Human Evolution*, 97:159–175.
- 1061 **274.** Marivaux, L., Aguirre-Diaz, W., Benites-Palomino, A., Billet, G., Boivin, M., Pujos, F., Salas-Gismondi, R., Tejada-Lara,  
1062 J. V., Varas-Malca, R. M., and Antoine, P.-O. (2020). New record of *Neosaimiri* (Cebidae, Platyrrhini) from the late  
1063 middle Miocene of Peruvian Amazonia. *Journal of Human Evolution*, 146:102835.
- 1064 **275.** Marivaux, L., Antoine, P.-O., Baqri, S. R. H., Benammi, M., Chaimanee, Y., Crochet, J. -Y., De Franceschi, D., Iqbal, N.,  
1065 Jaeger, J. -J., M'etais, G., et al. (2005). Anthropoid primates from the oligocene of Pakistan (Bugti Hills): data on early  
1066 anthropoid evolution and biogeography. *Proceedings of the National Academy of Sciences*, 102(24), 8436–8441.
- 1067 **276.** Maschenko, E. N., Takai, M. (2010). Primates of the genus *Altanius* (Mammalia, primates) from the lower Eocene of  
1068 Tsagan-Khushu, southern Mongolia. *Russ. J. Theriol*, 9(2), 61–69.
- 1069 **277.** Mason, M. A. (1990). *New fossil primates from the Uintan (Eocene) of southern California*. Museum of Paleontology,  
1070 University of California.
- 1071 **278.** Matsumura, H., Cuong, N. L., Thuy, N. K., Anezaki, T. (2001). Dental morphology of the early Hoabinhian, the Neolithic  
1072 Da But and the Metal Age Dong Son civilized peoples in Vietnam. *Zeitschrift für Morphologie und Anthropologie*, 59–73.
- 1073 **279.** Mattingly, S. G., Beard, K. C., Coster, P. M. C., Salem, M. J., Chaimanee, Y., Jaeger, J. -J. (2021). A new parapithecine  
1074 (Primates: Anthropoidea) from the early oligocene of Libya supports parallel evolution of large body size among  
1075 parapithecids. *Journal of Human Evolution*, 153, 102957.
- 1076 **280.** McCrossin, M. L. (1992). New species of bushbaby from the middle Miocene of Maboko Island, Kenya. *American Journal  
1077 of Physical Anthropology*, 89(2), 215–233.
- 1078 **281.** Meldrum, D. J., Kay, R. F. (1997). *Nuciraptor rubricae*, a new pitheciin seed predator from the Miocene of Colombia.  
1079 *American Journal of Physical Anthropology: The Official Publication of the American Association of Physical  
1080 Anthropologists*, 102(3), 407–427.
- 1081 **282.** Menz, U. M. (2017). Evolution und Funktionsvariabilität von bunodonten Molaren bei Primaten. PhD thesis, Johann  
1082 Wolfgang Goethe-Universität, Frankfurt am Main, Germany.
- 1083 **283.** Miller, E. R., Benefit, B. R., McCrossin, M. L., Plavcan, J. M., Leakey, M. G., El-Barkooky, A. N., Hamdan, M. A.,  
1084 Abdel Gawad, M. K., Hassan, S. M., Simons, E. L. (2009). Systematics of early and middle Miocene Old World monkeys.  
1085 *Journal of Human Evolution*, 57(3), 195–211.

- 1086 **284.** Minwer-Barakat, R., Marig'o, J., Becker, D., Costeur, L. (2017). A new primate assemblage from la verrerie de roches  
1087 (middle eocene, switzerland). *Journal of Human Evolution*, 113, 137–154.
- 1088 **285.** Minwer-Barakat, R., Marigo, J., Femenias-Gual, J., Moya-Sola, S. (2015). New material of *Pseudoloris parvulus*  
1089 (*Microchoerinae*, *Omomyidae*, *Primates*) from the late eocene of Sossís (northeastern Spain) and its implications for the  
1090 evolution of *Pseudoloris*. *Journal of Human Evolution*, 83, 74–90.
- 1091 **286.** Morris, W. J. (1954). An eocene fauna from the cathedral bluffs tongue of the washakie basin, Wyoming. *Journal of*  
1092 *Paleontology*, 28(2), 195–203.
- 1093 **287.** Morse, P. E., Chester, S. G., Boyer, D. M., Smith, T., Smith, R., Gigase, P., Bloch, J. I. (2019). New fossils, systematics,  
1094 and biogeography of the oldest known crown primate *teihardina* from the earliest eocene of asia, europe, and north  
1095 america. *Journal of Human Evolution*, 128, 103–131.
- 1096 **288.** Moyà-Solà, S., Köhler, M., Alba, D. M., Casanovas-Vilar, I., Galindo, J., Robles, J. M., Cabrera, L., Garcés, M., Almécija,  
1097 S., & Beamud, E. (2009). First partial face and upper dentition of the Middle Miocene hominoid *Dryopithecus fontani* from  
1098 Abocador de Can Mata (Vallès-Penedès Basin, Catalonia, NE Spain): Taxonomic and phylogenetic implications. *American*  
1099 *Journal of Physical Anthropology: The Official Publication of the American Association of Physical Anthropologists*,  
1100 139(2), 126–145.
- 1101 **289.** Muldoon, K. M., Gunnell, G. F. (2002). Omomyid primates (*Tarsiiformes*) from the early middle Eocene at South Pass,  
1102 greater Green River Basin, Wyoming. *Journal of Human Evolution*, 43(4), 479-511.
- 1103 **290.** Murphey, P. C., Dunn, R. H. (2009). *Hemiacodon engardae*, a new species of omomyid primate from the earliest Uintan  
1104 Turtle Bluff Member of the Bridger Formation, southwestern Wyoming, USA. *Journal of Human Evolution*, 57(2),  
1105 123-130.
- 1106 **291.** Nelson, M. E. (1977). Middle Eocene primates (*Mammalia*) from southwestern Wyoming. *The Southwestern Naturalist*,  
1107 22(4), 487-493.
- 1108 **292.** Nengo, I. O., Rae, T. C. (1992). New hominoid fossils from the early Miocene site of Songhor, Kenya. *Journal of Human*  
1109 *Evolution*, 23(5), 423-429.
- 1110 **293.** Neumann, A. M. (2013). A new Early Eocene (Lostcabinian) mammal assemblage from the Main Body of the Wasatch  
1111 Formation, Northern Green River Basin; The Pinnacles, Sweetwater Co., Wyoming. PhD thesis, University of Alberta  
1112 (Canada).
- 1113 **294.** Ni, X., Hu, Y., Wang, Y., Li, C. (2005). A clue to the Asian origin of Euprimates. *Anthropological Science*, 113(1), 3-9.
- 1114 **295.** Ni, X., Li, Q., Li, L., Beard, K. C. (2016). Oligocene primates from China reveal divergence between African and Asian  
1115 primate evolution. *Science*, 352(6286), 673-677.
- 1116 **296.** Ni, X., Meng, J., Beard, K. C., Gebo, D. L., Wang, Y., Li, C. (2010). A new tarkadectine primate from the Eocene of  
1117 Inner Mongolia, China: Phylogenetic and biogeographic implications. *Proceedings of the Royal Society B: Biological*  
1118 *Sciences*, 277(1679), 247-256.
- 1119 **297.** Novo, N. M., Fleagle, J. G. (2015). New specimens of platyrrhine primates from Patagonia (Pinturas Formation, Early  
1120 Miocene). *Ameghiniana*, 52(3), 367-372.
- 1121 **298.** Novo, N. M., Tejedor, M. F., Pérez, M. E., Krause, J. M. (2017). New primate locality from the Early Miocene of  
1122 Patagonia, Argentina. *American Journal of Physical Anthropology*, 164(4), 861-867.
- 1123 **299.** Harvard University. Museum of Comparative Zoology. (1905). *Bulletin of the Museum of Comparative Zoology*, 48.
- 1124 **300.** Patel, B. A., Grossman, A. (2006). Dental metric comparisons of *Morotopithecus* and *Afropithecus*: Implications for the  
1125 validity of the genus *Morotopithecus*. *Journal of Human Evolution*, 51(5), 506-512.
- 1126 **301.** Patnaik, R., Cameron, D., Sharma, J., Hogarth, J. (2005). Extinction of Siwalik fossil apes: a review based on a new  
1127 fossil tooth and on palaeoecological and palaeoclimatological evidence. *Anthropological Science*, 113(1), 65-72.
- 1128 **302.** Perry, J. M., Kay, R. F., Vizca'ino, S. F., Bargo, M. S. (2014). Oldest known cranium of a juvenile New World monkey  
1129 (Early Miocene, Patagonia, Argentina): Implications for the taxonomy and the molar eruption pattern of early platyrrhines.  
1130 *Journal of Human Evolution*, 74, 67-81.
- 1131 **303.** Pickford, M. (1985). A new look at *Kenyapithecus* based on recent discoveries in western Kenya. *Journal of Human*  
1132 *Evolution*, 14(2), 113-143.
- 1133 **304.** Pickford, M., Kunimatsu, Y. (2005). Catarrhines from the middle Miocene (ca. 14.5 Ma) of Kipsaraman, Tugen Hills,  
1134 Kenya. *Anthropological Science*, 113(2), 189-224.

- 1135 **305.** Pickford, M., Senut, B., Gommery, D., Musiime, E. (2009). La distinción entre *Ugandapithecus* y *Proconsul*. *Estudios*  
1136 *Geológicos*, 65(2), 183-241.
- 1137 **306.** Pilbeam, D. (1982). New hominoid skull material from the Miocene of Pakistan. *Nature*, 295(5846), 232-234.
- 1138 **307.** Pilbeam, D. R. (1969). Tertiary Pongidae of East Africa: evolutionary relationships and taxonomy. *Bulletin of the Peabody*  
1139 *Museum of Natural History*, 31, 1-185.
- 1140 **308.** Rasmussen, D. T., Shekelle, M., Walsh, S. L., Riney, B. O. (1995). The dentition of *Dyseolemur*, and comments on the  
1141 use of the anterior teeth in primate systematics. *Journal of Human Evolution*, 29(4), 301-320.
- 1142 **309.** Robinson, P. (1966). Fossil Mammalia of the Huerfano Formation, Eocene, of Colorado.
- 1143 **310.** Robinson, P. (2018). Diversity starts early: notharctid primates from the Sandcouleean (Early Eocene) of the Powder  
1144 River Basin, Wyoming, USA. *Historical Biology*, 30(1-2), 189-203.
- 1145 **311.** Rose, K. D. (1995). Anterior dentition and relationships of the early Eocene Omomyids *Arapahovius advena* and  
1146 *Teilhardina demissa*, sp. nov. *Journal of Human Evolution*, 28(3), 231-244.
- 1147 **312.** Rose, K. D., Bown, T. M. (1991). Additional fossil evidence on the differentiation of the earliest euprimates. *Proceedings*  
1148 *of the National Academy of Sciences*, 88(1), 98-101.
- 1149 **313.** Rose, K. D., Chester, S. G., Dunn, R. H., Boyer, D. M., Bloch, J. I. (2011). New fossils of the oldest North American  
1150 euprimate *Teilhardina brandti* (Omomyidae) from the Paleocene–Eocene Thermal Maximum. *American Journal of*  
1151 *Physical Anthropology*, 146(2), 281-305.
- 1152 **314.** Rose, K. D., Chew, A. E., Dunn, R. H., Kraus, M. J., Fricke, H. C., Zack, S. P. (2012). Earliest Eocene Mammalian fauna  
1153 from the Paleocene-Eocene Thermal Maximum at Sand Creek Divide, southern Bighorn Basin, Wyoming.
- 1154 **315.** Rose, K. D., MacPhee, R. D. E., Alexander, J. P. (1999). Skull of early Eocene *Cantius abditus* (primates: Adapi-  
1155 formes) and its phylogenetic implications, with a reevaluation of “*Hesperolemur*” actius. *American Journal of Physical*  
1156 *Anthropology: The Official Publication of the American Association of Physical Anthropologists*, 109(4), 523-539.
- 1157 **316.** Rose, K. D. (1975). *The Carpolestidae, early Tertiary primates from North America*. Museum of Comparative Zoology,  
1158 Harvard University.
- 1159 **317.** Rosenberger, A. L. (2011). The face of *Strigorhysis*: Implications of another tarsier-like, large-eyed Eocene North  
1160 American tarsiiform primate. *The Anatomical Record: Advances in Integrative Anatomy and Evolutionary Biology*,  
1161 294(5), 797-812.
- 1162 **318.** Rosenberger, A. L., Klukkert, Z. S., Cooke, S. B., Rímoli, R. (2013). Rethinking *Antillothrix*: The mandible and its  
1163 implications. *American Journal of Primatology*, 75(8), 825-836.
- 1164 **319.** Rossie, J. B., Hill, A. (2018). A new species of *Simiolus* from the middle Miocene of the Tugen Hills, Kenya. *Journal of*  
1165 *Human Evolution*, 125, 50-58.
- 1166 **320.** Rossie, J. B., MacLachy, L. (2006). A new pliopithecoid genus from the early Miocene of Uganda. *Journal of Human*  
1167 *Evolution*, 50(5), 568-586.
- 1168 **321.** Ruiz-Ramoni, D., Rincón, A. D., Solórzano, A., Moya-Solà, S. (2017). The first fossil platyrrhini (primates: anthropoidea)  
1169 from Venezuela: A capuchin monkey from the Plio-Pleistocene of El Breal de Orocuál. *Journal of Human Evolution*, 105,  
1170 127-131.
- 1171 **322.** Samuels, J. X., Albright, L. B., Fremd, T. J. (2015). The last fossil primate in North America, new material of the  
1172 enigmatic *Ekgmowechashala* from the Arikarean of Oregon. *American Journal of Physical Anthropology*, 158(1), 43-54.
- 1173 **323.** Sankhyan, A. R., Kelley, J., Harrison, T. (2017). A highly derived pliopithecoid from the late Miocene of Haritalyangar,  
1174 India. *Journal of Human Evolution*, 105, 1-12.
- 1175 **324.** Secord, R. (2008). The Tiffanian Land-Mammal Age (Middle and Late Paleocene) in the Northern Bighorn Basin,  
1176 Wyoming.
- 1177 **325.** Seiffert, E. R. (2012). Early primate evolution in Afro-Arabia. *Evolutionary Anthropology: Issues, News, and Reviews*,  
1178 21(6), 239-253.
- 1179 **326.** Seiffert, E. R., Perry, J. M. G., Simons, E. L., Boyer, D. M. (2009). Convergent evolution of anthropoid-like adaptations  
1180 in Eocene adapiform primates. *Nature*, 461(7267), 1118-1121.
- 1181 **327.** Seiffert, E. R., Simons, E. L., Attia, Y. (2003). Fossil evidence for an ancient divergence of lorises and galagos. *Nature*,  
1182 422(6930), 421-424.



- 1183 **328.** Seiffert, E. R., Simons, E. L., Boyer, D. M., Perry, J. M. G., Ryan, T. M., Sallam, H. M. (2010). A fossil primate of  
1184 uncertain affinities from the earliest late Eocene of Egypt. *Proceedings of the National Academy of Sciences*, 107(21),  
1185 9712-9717.
- 1186 **329.** Seiffert, E. R., Simons, E. L., Clyde, W. C., Rossie, J. B., Attia, Y., Bown, T. M., ... Mathison, M. E. (2005). Basal  
1187 anthropoids from Egypt and the antiquity of Africa's higher primate radiation. *Science*, 310(5746), 300-304.
- 1188 **330.** Seiffert, E. R., Simons, E. L., Fleagle, J. G., Godinot, M. (2010). Paleogene anthropoids. *Cenozoic mammals of Africa*.  
1189 *Berkeley: University of California Press.* p, 369-391.
- 1190 **331.** Seiffert, E. R., Simons, E. L., Ryan, T. M., Attia, Y. (2005). Additional remains of *Wadilemur elegans*, a primitive stem  
1191 galagid from the late Eocene of Egypt. *Proceedings of the National Academy of Sciences*, 102(32), 11396-11401.
- 1192 **332.** Seiffert, E. R., Tejedor, M. F., Fleagle, J. G., Novo, N.M., Cornejo, F.M., Bond, M., DeVries, D., Campbell Jr., K. E.  
1193 (2020). A parapithecoid stem anthropoid of African origin in the Paleogene of South America. *Science*, 368(6487), 194-197.
- 1194 **333.** Setoguchi, T., Rosenberger, A. L. (1987). A fossil owl monkey from La Venta, Colombia. *Nature*, 326(6114), 692-694.
- 1195 **334.** Setoguchi, T., Shigehara, N., Rosenberger, A.L., Cadena G., A. (1986). Primate fauna from the Miocene La Venta, in the  
1196 Tatacoa Desert, Department of Huila, Colombia. *Caldasia*, 13(63), 761-773.
- 1197 **335.** Silcox, M. T., Gunnell, G. F., Bloch, J. I. (2020). Cranial anatomy of *Microsyops annectens* (Microsyopidae, Euarchonta,  
1198 Mammalia) from the middle Eocene of northwestern Wyoming. *Journal of Paleontology*, 94(5), 979-1006.
- 1199 **336.** Silcox, M. T., Krause, D. W., Maas, M. C., Fox, R. C. (2001). New specimens of *Elphidotarsius russelli* (Mammalia,?  
1200 primates, Carpolestidae) and a revision of Plesiadapoid relationships. *Journal of Vertebrate Paleontology*, 21(1), 132-152.
- 1201 **337.** Simons, E. L., Rasmussen, D. T., Gebo, D. L. (1987). A new species of *Propliopithecus* from the Fayum, Egypt. *American*  
1202 *Journal of Physical Anthropology*, 73(2), 139-147.
- 1203 **338.** Simons, E. L. (1995). Egyptian oligocene primates: a review. *American Journal of Physical Anthropology*, 38(S21),  
1204 199-238.
- 1205 **339.** Simons, E. L. (1961). The dentition of *Ourayia*: its bearing on relationships of Omomyid prosimians. *Postilla*, (54), 1-20.
- 1206 **340.** Simons, E. L. (1969). Miocene monkey (*Prohylobates*) from northern Egypt. *Nature*, 223(5207), 687-689.
- 1207 **341.** Simons, E. L. (1974). *Parapithecus grangeri* (Parapithecidae, Old World higher primates): new species from the oligocene  
1208 of Egypt and the initial differentiation of Ceropithecoidea. *Postilla*, (166), 1974.
- 1209 **342.** Simons, E. L. (1989). Description of two genera and species of late Eocene anthropoidea from Egypt. *Proceedings of the*  
1210 *National Academy of Sciences*, 86(24), 9956-9960.
- 1211 **343.** Simons, E. L. (1992). Diversity in the early tertiary anthropoidean radiation in Africa. *Proceedings of the National*  
1212 *Academy of Sciences*, 89(22), 10743-10747.
- 1213 **344.** Simons, E. L. (1995). *Crania of Apidium*: primitive anthropoidean (primates, Parapithecidae) from the Egyptian oligocene.  
1214 *American Museum Novitates*; no. 3124.
- 1215 **345.** Simons, E. L. (1997). Preliminary description of the cranium of *Proteopithecus sylviae*, an Egyptian late Eocene anthro-  
1216 poidean primate. *Proceedings of the National Academy of Sciences*, 94(26), 14970-14975.
- 1217 **346.** Simons, E. L., Bown, T. M. (1985). *Afrotarsius chatrathi*, first tarsii-form primate (? Tarsiidae) from Africa. *Nature*,  
1218 313(6002), 475-477.
- 1219 **347.** Simons, E. L., Kay, R. F. (1983). *Qatrania*, new basal anthropoid primate from the Fayum, oligocene of Egypt. *Nature*,  
1220 304(5927), 624-626.
- 1221 **348.** Simons, E. L., Kay, R. F. (1988). New material of *Qatrania* from Egypt with comments on the phylogenetic position of  
1222 the Parapithecidae (Primates, Anthropoidea). *American Journal of Primatology*, 15(4), 337-347.
- 1223 **349.** Simons, E. L., Rasmussen, D. T. (1991). The generic classification of Fayum Anthropoidea. *International Journal of*  
1224 *Primatology*, 12, 163-178.
- 1225 **350.** Simons, E. L., Rasmussen, D. T. (1994). A remarkable cranium of *Plesiopithecus teras* (Primates, Prosimii) from the  
1226 Eocene of Egypt. *Proceedings of the National Academy of Sciences*, 91(21), 9946-9950.
- 1227 **351.** Simons, E. L., Seiffert, E. R., Chatrath, P. S., Attia, Y. (2001). Earliest record of a parapithecoid anthropoid from the Jebel  
1228 Qatrani Formation, northern Egypt. *Folia Primatologica*, 72(6), 316-331.

- 1229 **352.** Simons, E. L., Seiffert, E. R., Ryan, T. M., Attia, Y. (2007). A remarkable female cranium of the early Oligocene  
1230 anthropoid *Aegyptopithecus zeuxis* (Catarrhini, Propliopithecidae). *Proceedings of the National Academy of Sciences*,  
1231 104(21), 8731–8736.
- 1232 **353.** Simpson, G. G. (1937). The Fort Union of the Crazy Mountain field, Montana, and its Mammalian faunas. *Bulletin of the*  
1233 *United States National Museum*, 169, 1–287.
- 1234 **354.** Simpson, G. G., Granger, W., et al. (1935). The Tiffany fauna, Upper Paleocene. 3, Primates, Carnivora, Condylarthra,  
1235 and Amblypoda. American Museum Novitates; no. 817.
- 1236 **355.** Skinner, M. M., Leakey, M. G., Leakey, L. N., Manthi, F. K., Spoor, F. (2020). Hominin dental remains from the Pliocene  
1237 localities at Lomekwi, Kenya (1982–2009). *Journal of Human Evolution*, 145, 102820.
- 1238 **356.** Smith, T., Rose, K. D., Gingerich, P. D. (2006). Rapid Asia–Europe–North America geographic dispersal of earliest  
1239 Eocene primate *Teilhardina* during the Paleocene–Eocene Thermal Maximum. *Proceedings of the National Academy of*  
1240 *Sciences*, 103(30), 11223–11227.
- 1241 **357.** Moyà-Solà, S., Köhler, M. (1995). New partial cranium of *Dryopithecus lartet*, 1863 (Hominoidea, Primates) from the  
1242 upper Miocene of Can Llobateres, Barcelona, Spain. *Journal of Human Evolution*, 29(2), 101–139.
- 1243 **358.** Stevens, N. J., Seiffert, E. R., O'Connor, P. M., Roberts, E. M., Schmitz, M. D., Krause, C., ... Temu, J. (2013).  
1244 Palaeontological evidence for an Oligocene divergence between Old World monkeys and apes. *Nature*, 497(7451),  
1245 611–614.
- 1246 **359.** Stock, C. (1934). Microsyopsinae and Hyopsodontidae in the Sespe Upper Eocene, California. *Proceedings of the National*  
1247 *Academy of Sciences*, 20(6), 349–354.
- 1248 **360.** Stock, C. (1938). A tarsiid primate and a mixodectid from the Poway Eocene, California. *Proceedings of the National*  
1249 *Academy of Sciences*, 24(7), 288–293.
- 1250 **361.** Suwa, G., Asfaw, B., Haile-Selassie, Y., White, T. D., Katoh, S., WoldeGabriel, G., ... Beyene, Y. (2007). Early Pleistocene  
1251 *Homo erectus* fossils from Konso, southern Ethiopia. *Anthropological Science*, 115(2), 133–151.
- 1252 **362.** Szalay, F. S. (1976). Systematics of the Omomyidae (Tarsiiformes, Primates): Taxonomy, Phylogeny, and Adaptations.  
1253 *Bulletin of the AMNH*; v. 156, article 3.
- 1254 **363.** Takai, M. (1994). New specimens of *Neosaimiri fieldsi* from La Venta, Colombia: A middle Miocene ancestor of the  
1255 living squirrel monkeys. *Journal of Human Evolution*, 27(4), 329–360.
- 1256 **364.** Takai, M., Anaya, F. (1996). New specimens of the oldest fossil platyrrhine, *Branisella boliviana*, from Salla, Bo-  
1257 livia. *American Journal of Physical Anthropology: The Official Publication of the American Association of Physical*  
1258 *Anthropologists*, 99(2), 301–317.
- 1259 **365.** Takai, M., Anaya, F., Shigehara, N., Setoguchi, T. (2000). New fossil materials of the earliest new world monkey,  
1260 *branisella boliviana*, and the problem of platyrrhine origins. *American Journal of Physical Anthropology: The Official*  
1261 *Publication of the American Association of Physical Anthropologists*, 111(2), 263–281.
- 1262 **366.** Takai, M., Anaya, F., Suzuki, H., Shigehara, N., Setoguchi, T. (2001). A new platyrrhine from the middle Miocene of la  
1263 venta, colombia, and the phyletic position of callicebinae. *Anthropological Science*, 109(4), 289–307.
- 1264 **367.** Takai, M., Nishimura, T., Shigehara, N., Setoguchi, T. (2009). Meaning of the canine sexual dimorphism in fossil owl  
1265 monkey, *aotus dindensis* from the middle Miocene of la venta, colombia. In *Comparative Dental Morphology* (Vol. 13,  
1266 pp. 55–59). Karger Publishers.
- 1267 **368.** Tejedor, M. F., Rosenberger, A. L. (2008). A neotype for *homunculus patagonicus* ameghino, 1891, and a new  
1268 interpretation of the taxon.
- 1269 **369.** Tornow, M. A. (2008). Systematic analysis of the eocene primate family omomyidae using gnathic and postcranial data.  
1270 *Bulletin of the Peabody Museum of Natural History*, 49(1), 43–129.
- 1271 **370.** Trinkaus, E. (1978). Dental remains from the shanidar adult neanderthals. *Journal of Human Evolution*, 7(5), 369–382.
- 1272 **371.** van den Bergh, G. D., Kaifu, Y., Kurniawan, I., Kono, R. T., Brumm, A., Setiyabudi, E., Aziz, F., Morwood, M. J. (2016).  
1273 *Homo floresiensis*-like fossils from the early middle pleistocene of flores. *Nature*, 534(7606), 245–248.
- 1274 **372.** Wang, W. (2009). New discoveries of *gigantopithecus blacki* teeth from chuifeng cave in the bubing basin, guangxi, south  
1275 china. *Journal of Human Evolution*, 57(3), 229–240.
- 1276 **373.** Webb, M. W. (1996). Late Paleocene mammals from near Drayton Valley, Alberta.



- 1277 **374.** West, R. M. (1982). Fossil mammals from the Lower Buck Hill Group, Eocene of Trans-Pecos Texas: Marsupicarnivora,  
1278 primates, Taeniodonta, Condylarthra, Bunodont Artiodactyla, and Dinocerata. Technical report, Texas Memorial Museum,  
1279 The University of Texas at Austin.
- 1280 **375.** Westgate, J. W. (1990). Uintan land mammals (excluding rodents) from an estuarine facies of the Laredo Formation  
1281 (Middle Eocene, Claiborne Group) of Webb County, Texas. *Journal of Paleontology*, 64(3), 454-468.
- 1282 **376.** Wheeler, B. C. (2010). Community ecology of the middle Miocene primates of La Venta, Colombia: The relationship  
1283 between ecological diversity, divergence time, and phylogenetic richness. *Primates*, 51, 131-138.
- 1284 **377.** White, T. D., Suwa, G., Asfaw, B. (1994). Australopithecus ramidus, a new species of early hominid from Aramis,  
1285 Ethiopia. *Nature*, 371(6495), 306-312.
- 1286 **378.** White, T. D., Suwa, G., Simpson, S., Asfaw, B. (2000). Jaws and teeth of Australopithecus afarensis from Maka, Middle  
1287 Awash, Ethiopia. *American Journal of Physical Anthropology: The Official Publication of the American Association of*  
1288 *Physical Anthropologists*, 111(1), 45-68.
- 1289 **379.** Williams, B. A., Covert, H. H. (1994). New early Eocene anaptomorphine primate (Omomyidae) from the Washakie  
1290 Basin, Wyoming, with comments on the phylogeny and paleobiology of anaptomorphines. *American Journal of Physical*  
1291 *Anthropology*, 93(3), 323-340.
- 1292 **380.** Williams, B. A., Kirk, E. C. (2008). New Uintan primates from Texas and their implications for North American patterns  
1293 of species richness during the Eocene. *Journal of Human Evolution*, 55(6), 927-941.
- 1294 **381.** Xie, X.-X., Delson, E. (1989). A new species of Dryopithecus from Gansu, China. *Kexue Tongbao (English Edition)*,  
1295 34(3), 223-229.
- 1296 **382.** Zhang, Y. (1982). Variability and evolutionary trends in tooth size of Gigantopithecus blacki. *American Journal of*  
1297 *Physical Anthropology*, 59(1), 21-32.
- 1298 **383.** Pan, Y., Waddle, D. M., Fleagle, J. G. (1989). Sexual dimorphism in Laccopithecus robustus, a late Miocene hominoid  
1299 from China. *American Journal of Physical Anthropology*, 79(2), 137-158.
- 1300 **384.** Zaim, Y., Ciochon, R. L., Polanski, J. M., Grine, F. E., Bettis III, E. A., Rizal, Y., Franciscus, R. G., Larick, R. R., Heizler,  
1301 M., Eaves, K. L., et al. (2011). New 1.5 million-year-old Homo erectus maxilla from Sangiran (Central Java, Indonesia).  
1302 *Journal of Human Evolution*, 61(4), 363-376.
- 1303 **385.** Zalmout, I. S., Sanders, W. J., MacLatchy, L. M., Gunnell, G. F., Al-Mufarreh, Y. A., Ali, M. A., Nasser, A.-A. H.,  
1304 Al-Masari, A. M., Al-Sobhi, S. A., Nadhra, A. O., et al. (2010). New Oligocene primate from Saudi Arabia and the  
1305 divergence of apes and Old World monkeys. *Nature*, 466(7304), 360-364.
- 1306 **386.** Zhang, Y., Harrison, T. (2017). Gigantopithecus blacki: A giant ape from the Pleistocene of Asia revisited. *American*  
1307 *Journal of Physical Anthropology*, 162, 153-177.
- 1308 **387.** Zhang, Y., Jin, C., Cai, Y., Kono, R., Wang, W., Wang, Y., Zhu, M., Yan, Y. (2013). New 400-320 ka Gigantopithecus  
1309 blacki remains from Hejiang Cave, Chongzuo City, Guangxi, South China. *Quaternary International*, 30(1), e11.
- 1310 **388.** Zhao, L.-X., Zhang, L.-Z. (2013). New fossil evidence and diet analysis of Gigantopithecus blacki and its distribution  
1311 and extinction in South China. *Quaternary International*, 286, 69-74.
- 1312 **389.** Zijlstra, J. S., Flynn, L. J., and Wessels, W. The westernmost tarsier: A new genus and species from the Miocene of  
1313 Pakistan. *Journal of Human Evolution*, 65(5):544–550, 2013.
